# Supplementary material for: TGF-β/Smad2/3 Signaling Directly Regulates Several miRNAs in Mouse ES Cells and Early Embryos
Source: PLoS One. 2013 Jan 30;8(1):e55186. doi: 10.1371/journal.pone.0055186 (PMC3559380; doi:10.1371/journal.pone.0055186)
Supplement: Table S1 — Identification of Smad2/3 inducible miRNAs by small RNA deep-sequencing in TAG1 ES cells. miRNAs displaying a significant p-Smad2/3 activation profile and a high abundance, also shown in Table 1. (XLSX) [file pone.0055186.s001.xlsx]

## Sheet: Table S1
Table S1. Identification of Smad2/3 inducible miRNAs by small RNA deep-sequencing in TAG1 ES cells
miRNA	Raw reads			Normalized reads			Fold change comparisons and Z-scores				Significant p-Smad2/3 activation profile	Qnorm (log2 scale)
	0 h	16 h	16+12 h	0 h	16 h	16+12 h	16h vs 0h		16+12h vs. 16h			0 h	16 h	16+12 h	16h v 0h	16+12h vs. 16h	Significant p-Smad2/3 activation profile
							Fold change	Z-score	Fold change	Z-score
485-3p	15123	3204	14883	1380.38	282.174	1504.02	-4.89194	-90.5156	5.3301	96.3437	yes	13.8517	11.7334	13.7985	-4.34189	4.18464	yes
181d-5p	107042	42731	183584	9770.45	3763.29	18552.2	-2.59625	-173.709	4.92979	331.293	yes	16.9152	15.5655	17.6137	-2.54851	4.13596	yes
423-5p	62261	30061	112927	5682.99	2647.45	11411.9	-2.14659	-111.658	4.31054	246.519	yes	15.9237	14.956	16.5054	-1.95565	2.92697	yes
25-5p	15513	8015	29645	1415.98	705.876	2995.8	-2.00599	-51.6612	4.24409	125.191	yes	14.0271	12.9097	14.6516	-2.16948	3.34459	yes
320-3p	90928	52727	174984	8299.62	4643.63	17683.2	-1.78731	-107.933	3.80805	291.217	yes	16.5054	15.7613	17.1627	-1.67495	2.64158	yes
7a-5p	12989	9111	28023	1185.59	802.4	2831.89	-1.47756	-28.7638	3.52928	111.735	yes	13.6556	13.274	14.594	-1.30279	2.49666	yes
128-3p	10758	6212	14348	981.956	547.087	1449.95	-1.79488	-37.2469	2.65031	66.7771	yes	13.274	12.5654	13.7626	-1.6342	2.2928	yes
181c-5p	11420	6098	13507	1042.38	537.047	1364.96	-1.94095	-42.6005	2.54161	62.7061	yes	13.3388	12.5485	13.6872	-1.72943	2.20175	yes
295-5p	15726	10758	22723	1435.42	947.45	2296.29	-1.51503	-33.4631	2.42366	78.2009	yes	14.0547	13.4984	14.2273	-1.47054	1.65745	yes
543-3p	77103	24436	50833	7037.72	2152.06	5136.97	-3.27022	-171.397	2.387	115.532	yes	16.1911	14.7485	15.5655	-2.71808	1.76172	yes
298-5p	20568	13599	27069	1877.38	1197.65	2735.48	-1.56755	-41.046	2.28403	80.9103	yes	14.4387	13.8517	14.4531	-1.50202	1.51713	yes
323-3p	12677	6410	12510	1157.12	564.524	1264.21	-2.04972	-47.8608	2.23942	53.9439	yes	13.5483	12.6272	13.6112	-1.89347	1.9779	yes
290-5p	390434	205450	370150	35637.6	18093.8	37405.8	-1.9696	-256.937	2.06732	273.55	yes	18.2735	17.6137	18.2735	-1.5798	1.5798	yes
485-5p	11901	5602	9914	1086.29	493.364	1001.87	-2.20179	-50.0056	2.03069	43.2882	yes	13.3858	12.4336	13.2108	-1.93484	1.71383	yes
433-3p	16712	6807	11648	1525.42	599.488	1177.1	-2.54454	-67.376	1.96351	45.0894	yes	14.1418	12.7328	13.5483	-2.65553	1.7599	yes
744-5p	16396	12174	20521	1496.57	1072.16	2073.77	-1.39586	-28.0237	1.9342	58.7625	yes	14.093	13.6112	14.1418	-1.3965	1.4445	yes
382-5p	21060	11862	19882	1922.29	1044.68	2009.19	-1.84008	-53.9868	1.92327	57.4262	yes	14.4531	13.5698	14.0517	-1.84453	1.39655	yes
672-5p	43113	19036	31043	3935.22	1676.49	3137.08	-2.3473	-101.195	1.87122	69.266	yes	15.2015	14.3425	14.8813	-1.81381	1.45282	yes
669c-5p	15701	12393	19642	1433.14	1091.44	1984.94	-1.31307	-22.7516	1.81864	52.956	yes	14.0517	13.6872	14.0271	-1.28744	1.26566	yes
185-5p	26062	17301	27039	2378.86	1523.69	2732.45	-1.56125	-45.8482	1.79331	60.9121	yes	14.6516	14.2062	14.4387	-1.36162	1.1748	no
541-5p	28812	19793	30572	2629.87	1743.16	3089.48	-1.50868	-44.9079	1.77235	63.666	yes	14.833	14.4531	14.833	-1.30127	1.30127	yes
92a-3p	58724	36877	55151	5360.14	3247.73	5573.33	-1.65043	-76.3636	1.71607	81.4375	yes	15.7613	15.3585	15.7322	-1.32204	1.29564	yes
130a-3p	15364	11642	16887	1402.38	1025.3	1706.53	-1.36777	-25.6075	1.66442	42.7807	yes	13.9795	13.5483	13.9026	-1.3484	1.27841	yes
363-5p	24461	13906	19919	2232.72	1224.69	2012.93	-1.82309	-57.4481	1.64362	45.4666	yes	14.594	13.9026	14.0547	-1.61486	1.11119	no
291a-5p	28030	21958	29674	2558.49	1933.83	2998.73	-1.32302	-31.1966	1.55067	49.7379	yes	14.7485	14.5092	14.6629	-1.18047	1.11242	no
25-3p	140851	111946	148185	12856.4	9859.01	14975	-1.30403	-66.8719	1.51891	106.982	yes	17.1193	16.9152	16.8515	-1.15199	-1.04514	no
341-3p	14130	9000	11191	1289.74	792.624	1130.92	-1.62718	-36.4757	1.4268	25.248	yes	13.7626	13.2108	13.4412	-1.46581	1.17311	no
382-3p	12866	7865	9310	1174.37	692.665	940.83	-1.69543	-37.3317	1.35828	20.0805	yes	13.6112	12.8439	13.1686	-1.70204	1.25236	yes
214-3p	16	78	1	1.46043	6.86941	0.101056	4.70369	6.22243	-67.9763	-8.07192	no	4.12628	6.35661	0	4.6924	-81.9465	no
99a-5p	35	362	16	3.19469	31.8811	1.61689	9.97941	16.058	-19.7175	-16.5004	no	5.04309	8.61769	3.96494	11.9141	-25.1546	no
3096b-5p	1910	15732	834	174.339	1385.51	84.2806	7.94721	101.744	-16.4392	-107.206	no	10.9476	14.0547	9.70346	8.61663	-20.4106	no
3096-5p	1900	15688	837	173.426	1381.63	84.5838	7.9667	101.651	-16.3345	-106.994	no	10.9415	14.0517	9.71041	8.63499	-20.2703	no
214-5p	4	18	1	0.365107	1.58525	0.101056	4.34187	2.90139	-15.6868	-3.60928	no	2	4.11328	0	4.32675	-17.307	no
mmu-let-7b-5p	2309	9988	685	210.758	879.636	69.2233	4.17368	67.2937	-12.7072	-83.1724	no	11.2717	13.4412	9.32692	4.49854	-17.3189	no
34c-3p	11	55	4	1.00404	4.84381	0.404224	4.8243	5.27158	-11.983	-6.12667	no	3.5222	5.81571	2	4.9025	-14.0813	no
196b-3p	8	13	1	0.730214	1.1449	0.101056	1.5679	1.0093	-11.3294	-2.95719	no	2.93578	3.69759	0	1.69561	-12.9743	no
206-3p	44	515	40	4.01618	45.3557	4.04224	11.2932	19.5017	-11.2204	-18.5891	no	5.44285	9.06002	5.34539	12.2709	-13.1285	no
5117-3p	175	787	68	15.9734	69.3106	6.8718	4.33911	19.1805	-10.0862	-22.6353	no	7.35831	9.70346	6.05864	5.08116	-12.5084	no
100-5p	28	215	19	2.55575	18.9349	1.92006	7.40874	11.7192	-9.86161	-11.7904	no	4.78987	7.75486	4.15386	7.8082	-12.1341	no
10a-3p	6	10	1	0.547661	0.880693	0.101056	1.6081	0.928612	-8.71491	-2.49174	no	2.49728	3.32193	0	1.7711	-10	no
199a-5p	40	220	23	3.65107	19.3753	2.32429	5.30673	10.8766	-8.336	-11.5946	no	5.29742	7.80936	4.48081	5.70388	-10.046	no
199b-5p	33	142	15	3.01213	12.5058	1.51584	4.15182	8.00435	-8.25012	-9.29729	no	4.98426	7.27922	3.8049	4.90741	-11.1142	no
125b-5p	1063	3995	460	97.0272	351.837	46.4857	3.62617	39.9653	-7.56871	-48.4985	no	9.99948	11.99	8.71061	3.97372	-9.70926	no
98-5p	24	362	43	2.19064	31.8811	4.3454	14.5533	16.8552	-7.33674	-14.5037	no	4.58413	8.61769	5.41495	16.3766	-9.20705	no
196b-5p	109	162	20	9.94917	14.2672	2.02112	1.43401	2.92559	-7.05908	-9.62213	no	6.66222	7.41403	4.21911	1.6839	-9.1573	no
mmu-let-7i-5p	1240	6375	816	113.183	561.442	82.4616	4.96047	57.3027	-6.80852	-59.883	no	10.2642	12.6047	9.65416	5.06492	-7.73048	no
878-3p	6	7	1	0.547661	0.616485	0.101056	1.12567	0.212901	-6.10044	-1.93166	no	1.58496	3	1.58496	2.66667	-2.66667	no
199a-3p	5995	22066	3330	547.204	1943.34	336.516	3.55139	93.0157	-5.77487	-106.943	no	12.5851	14.6228	11.7299	4.10595	-7.42778	no
199b-3p	5995	22066	3330	547.204	1943.34	336.516	3.55139	93.0157	-5.77487	-106.943	no	12.5851	14.6228	11.7299	4.10595	-7.42778	no
29a-5p	10	19	3	0.912768	1.67332	0.303168	1.83323	1.5752	-5.51944	-3.09645	no	3.5222	3.54312	3.16993	1.01461	-1.29522	no
34b-3p	52	176	28	4.74639	15.5002	2.82957	3.26568	7.94336	-5.47794	-9.40356	no	5.677	7.46759	4.75423	3.45956	-6.55849	no
145-5p	275	557	89	25.1011	49.0546	8.99398	1.95428	9.26238	-5.45416	-16.7076	no	8.13517	9.1337	6.48272	1.99797	-6.28097	no
181a-2-3p	13	25	4	1.1866	2.20173	0.404224	1.8555	1.83671	-5.44682	-3.53817	no	3.8049	4.71722	2	1.88207	-6.57603	no
31-3p	15	43	7	1.36915	3.78698	0.707391	2.76593	3.54095	-5.35345	-4.61652	no	4.12628	4.93793	4.15386	1.75521	-1.72198	no
302c-3p	26	49	9	2.3732	4.3154	0.909503	1.81839	2.50133	-4.74478	-4.7405	no	4.71722	5.63395	3.16993	1.88783	-5.51753	no
703	35	186	35	3.19469	16.3809	3.53696	5.12754	9.89312	-4.63135	-9.15822	no	5.04309	7.56466	5.15601	5.74204	-5.30978	no
135a-5p	7	10	2	0.638938	0.880693	0.202112	1.37837	0.653973	-4.35746	-2.07643	no	2.69616	3.32193	1	1.54303	-5	no
669e-3p	7	10	2	0.638938	0.880693	0.202112	1.37837	0.653973	-4.35746	-2.07643	no	2.69616	3.32193	1	1.54303	-5	no
3096-3p	11	19	4	1.00404	1.67332	0.404224	1.66658	1.36286	-4.13958	-2.80503	no	3.5222	2.58496	4.02727	-1.91485	2.71756	no
365-3p	159	400	87	14.513	35.2277	8.79186	2.42732	9.77206	-4.00686	-12.6982	no	7.23166	8.78443	6.45814	2.93382	-5.01516	no
10a-5p	424	880	193	38.7014	77.501	19.5038	2.00254	11.9842	-3.97364	-18.7683	no	8.71061	9.85534	7.63021	2.21104	-4.6755	no
mmu-let-7e-3p	7	9	2	0.638938	0.792624	0.202112	1.24053	0.428531	-3.92171	-1.88729	no	2.69616	3.16993	1	1.38873	-4.5	no
mmu-let-7a-1-3p	4	9	2	0.365107	0.792624	0.202112	2.17093	1.32248	-3.92171	-1.88729	no	2	3.16993	1	2.25	-4.5	no
mmu-let-7c-2-3p	4	9	2	0.365107	0.792624	0.202112	2.17093	1.32248	-3.92171	-1.88729	no	2	3.16993	1	2.25	-4.5	no
467c-3p	20	22	5	1.82554	1.93753	0.50528	1.06135	0.192734	-3.83456	-2.92175	no	2.69616	3.54312	4.75423	1.79871	2.31515	no
125b-1-3p	20	43	10	1.82554	3.78698	1.01056	2.07445	2.75622	-3.74741	-4.04255	no	4.39123	5.44285	3.32193	2.07286	-4.34971	no
186-3p	110	274	64	10.0404	24.131	6.46758	2.40338	8.01998	-3.73107	-10.1842	no	6.67365	8.16677	5.99988	2.81496	-4.49053	no
463-5p	6	8	2	0.547661	0.704555	0.202112	1.28648	0.46768	-3.48596	-1.6842	no	2	2.58496	2.65909	1.5	1.05273	no
880-3p	32	27	7	2.92086	2.37787	0.707391	-1.22835	-0.788444	-3.36147	-3.03675	no	4.93793	4.78112	2.87157	-1.11482	-3.75692	no
181a-1-3p	8	14	4	0.730214	1.23297	0.404224	1.6885	1.19551	-3.05022	-2.07058	no	2.93578	3.8049	2	1.82654	-3.49404	no
582-5p	45	38	11	4.10746	3.34663	1.11161	-1.22734	-0.931434	-3.01061	-3.38447	no	5.48105	5.21569	3.4136	-1.20193	-3.48726	no
31-5p	857	2791	831	78.2242	245.801	83.9775	3.14227	30.9479	-2.92699	-28.5044	no	9.65416	11.5149	9.68086	3.63203	-3.56543	no
130a-5p	43	77	23	3.9249	6.78134	2.32429	1.72777	2.90832	-2.9176	-4.7245	no	5.54425	5.74573	5.41495	1.14988	-1.2577	no
878-5p	34	20	6	3.10341	1.76139	0.606335	-1.76191	-2.03691	-2.90497	-2.40116	no	4.99862	4.27126	2.65909	-1.6556	-3.05711	no
193-3p	383	595	179	34.959	52.4012	18.089	1.49893	6.22085	-2.89686	-13.0735	no	8.58039	9.34298	7.4838	1.69653	-3.628	no
344d-3p	14	53	17	1.27788	4.66767	1.71795	3.65268	4.61896	-2.717	-3.73714	no	3.96494	5.74573	4.02727	3.43615	-3.29085	no
29b-3p	623	1684	544	56.8654	148.309	54.9744	2.60806	21.2353	-2.69778	-20.9611	no	9.27685	10.7589	9.00615	2.79345	-3.37	no
3473b	222072	220119	71542	20270	19385.7	7229.74	-1.04562	-14.9812	-2.68139	-240.248	no	17.8205	18.2735	16.0848	1.36888	-4.55893	no
29a-3p	13710	36466	11937	1251.4	3211.54	1206.3	2.56634	97.7087	-2.66229	-96.7231	no	13.6872	15.2901	13.5698	3.03756	-3.29498	no
5133	8	6	2	0.730214	0.528416	0.202112	-1.38189	-0.601536	-2.61447	-1.22288	no	2.69616	2	2.32193	-1.62019	1.25	no
15b-5p	966	1345	462	88.1734	118.453	46.6878	1.34341	7.0256	-2.53713	-17.8962	no	9.82504	10.4362	8.72928	1.52744	-3.26454	no
155-5p	59	115	40	5.38533	10.128	4.04224	1.88066	4.0101	-2.50554	-5.1815	no	5.84096	6.98715	5.34539	2.21329	-3.12047	no
29c-5p	9	14	5	0.821491	1.23297	0.50528	1.50089	0.956955	-2.44018	-1.76961	no	3.16993	3.8049	2.32193	1.55291	-2.79523	no
652-5p	23	22	8	2.09937	1.93753	0.808447	-1.08353	-0.269086	-2.3966	-2.1851	no	4.50219	4.50219	3	1	-2.83271	no
471-3p	10	8	3	0.912768	0.704555	0.303168	-1.29552	-0.547369	-2.32398	-1.28284	no	3.32193	3	1.58496	-1.25	-2.66667	no
340-3p	7	8	3	0.638938	0.704555	0.303168	1.1027	0.188963	-2.32398	-1.28284	no	2.69616	3	1.58496	1.23443	-2.66667	no
138-1-3p	3	8	3	0.27383	0.704555	0.303168	2.57296	1.44847	-2.32398	-1.28284	no	2.49728	1.58496	2.32193	-1.88207	1.66667	no
669d-3p	3	8	3	0.27383	0.704555	0.303168	2.57296	1.44847	-2.32398	-1.28284	no	1.58496	1	3.16993	-1.5	4.5	no
495-5p	37	39	15	3.37724	3.4347	1.51584	1.01701	0.0735157	-2.26588	-2.76793	no	5.19628	5.28509	3.8049	1.06349	-2.78986	no
292-3p	48063	69785	27111	4387.04	6145.92	2739.73	1.40093	57.2971	-2.24326	-116.256	no	15.3585	16.1911	14.5092	1.78084	-3.2086	no
431-5p	278	281	111	25.375	24.7475	11.2172	-1.02536	-0.296007	-2.20621	-7.24393	no	8.16281	8.20104	6.73909	1.02685	-2.75481	no
743a-3p	9	5	2	0.821491	0.440347	0.202112	-1.86556	-1.13614	-2.17873	-0.954472	no	3.16993	2.32193	1	-1.8	-2.5	no
24-1-5p	6	5	2	0.547661	0.440347	0.202112	-1.2437	-0.360885	-2.17873	-0.954472	no	2.49728	2.32193	1	-1.12924	-2.5	no
574-3p	176	117	47	16.0647	10.3041	4.74963	-1.55906	-3.75357	-2.16946	-4.59759	no	7.36971	7.0115	5.54425	-1.28184	-2.76494	no
34b-5p	166	389	159	15.1519	34.259	16.0679	2.26103	9.04606	-2.13214	-8.23722	no	7.27922	8.75635	7.26409	2.78394	-2.81329	no
302b-3p	137	205	84	12.5049	18.0542	8.4887	1.44377	3.34684	-2.12685	-5.96443	no	7.0115	7.63619	6.38872	1.54188	-2.37425	no
374-5p	1027	1053	436	93.7413	92.737	44.0604	-1.01083	-0.245614	-2.10477	-13.372	no	9.94781	10.1258	8.67644	1.13133	-2.73093	no
mmu-let-7f-5p	56808	127361	52757	5185.25	11216.6	5331.41	2.16317	157.403	-2.10387	-147.617	no	15.7322	17.1627	15.6152	2.6954	-2.92321	no
677-5p	109	70	29	9.94917	6.16485	2.93062	-1.61385	-3.15479	-2.1036	-3.44557	no	6.66222	6.19857	4.84111	-1.37903	-2.56234	no
302d-3p	298	373	156	27.2005	32.8499	15.7647	1.20769	2.4325	-2.08376	-7.87413	no	8.22406	8.65141	7.2056	1.34477	-2.72416	no
210-3p	3985	1778	747	363.738	156.587	75.4888	-2.32291	-30.4387	-2.07431	-17.1086	no	11.8572	10.8153	9.50415	-2.05891	-2.48139	no
181a-5p	1519	2045	865	138.649	180.102	87.4134	1.29897	7.74501	-2.06035	-18.2144	no	10.6046	11.0667	9.76833	1.3776	-2.45954	no
106a-3p	87	80	34	7.94108	7.04555	3.4359	-1.12711	-0.772919	-2.05057	-3.5836	no	6.38872	6.38573	5.0936	-1.00207	-2.44889	no
466d-3p	70	120	51	6.38938	10.5683	5.15385	1.65405	3.38142	-2.05057	-4.38901	no	6.11178	7.0482	5.69568	1.91377	-2.55357	no
709	29	54	23	2.64703	4.75574	2.32429	1.79664	2.58159	-2.04611	-2.93717	no	4.84111	5.7812	4.48081	1.91865	-2.46296	no
3058-5p	10	7	3	0.912768	0.616485	0.303168	-1.4806	-0.801474	-2.03348	-1.05025	no	3.32193	2.80735	1.58496	-1.42857	-2.33333	no
1839-3p	78	70	30	7.11959	6.16485	3.03168	-1.15487	-0.875311	-2.03348	-3.32118	no	6.21487	6.19857	4.88948	-1.01136	-2.47785	no
5121	518	402	173	47.2814	35.4039	17.4827	-1.33549	-4.36765	-2.02508	-7.9222	no	9.06002	8.79521	7.41403	-1.20147	-2.60482	no
mmu-let-7d-5p	4034	8995	3883	368.211	792.184	392.4	2.15144	41.4397	-2.01882	-37.3542	no	11.9007	13.1686	11.9528	2.40812	-2.32272	no
741-3p	14	23	10	1.27788	2.02559	1.01056	1.58513	1.37103	-2.00443	-1.87297	no	3.32193	4.59356	3.7154	2.41434	-1.83802	no
338-3p	5	16	7	0.456384	1.40911	0.707391	3.08755	2.31881	-1.99198	-1.55098	no	2.32193	3.90475	2.87157	2.99555	-2.04653	no
743b-5p	12	9	4	1.09532	0.792624	0.404224	-1.38189	-0.736728	-1.96085	-1.14187	no	3.69759	3.16993	2	-1.44159	-2.25	no
mmu-let-7c-5p	53098	68269	30450	4846.62	6012.4	3077.15	1.24054	37.425	-1.95389	-99.2574	no	15.6152	16.0848	14.7485	1.38474	-2.52494	no
5097	529	757	338	48.2854	66.6685	34.1569	1.38072	5.71764	-1.95183	-10.4148	no	9.11685	9.68086	8.32543	1.47837	-2.55872	no
652-3p	93	103	46	8.48874	9.07114	4.64857	1.06861	0.463981	-1.95138	-3.84052	no	6.45258	6.8453	5.52356	1.31287	-2.49967	no
322-5p	168	187	84	15.3345	16.469	8.4887	1.07398	0.671562	-1.94011	-5.13857	no	7.3007	7.56724	6.38872	1.20292	-2.26345	no
193-5p	32	69	31	2.92086	6.07678	3.13273	2.08048	3.50247	-1.93977	-3.12071	no	4.93793	6.1786	4.99144	2.36309	-2.27704	no
500-3p	120	178	82	10.9532	15.6763	8.28658	1.43121	3.05163	-1.89177	-4.85795	no	6.81387	7.4838	6.31977	1.591	-2.24082	no
5100	10	15	7	0.912768	1.32104	0.707391	1.44729	0.910725	-1.86748	-1.3868	no	3.32193	3.83807	2.87157	1.43013	-1.9541	no
291a-3p	5307	6566	3081	484.406	578.263	311.353	1.19376	9.60971	-1.85726	-28.812	no	12.3473	12.6631	11.4737	1.2447	-2.28061	no
10b-5p	76	131	63	6.93704	11.5371	6.36652	1.66311	3.56604	-1.81215	-3.93501	no	6.17546	7.17135	5.97716	1.99431	-2.28816	no
30b-5p	224	330	159	20.446	29.0629	16.0679	1.42145	4.08327	-1.80876	-6.22921	no	7.77901	8.45268	7.26409	1.59512	-2.27929	no
93-3p	133	172	83	12.1398	15.1479	8.38764	1.24779	1.92112	-1.80598	-4.4875	no	6.97749	7.45381	6.35661	1.39119	-2.13939	no
496-3p	250	240	116	22.8192	21.1366	11.7225	-1.0796	-0.847785	-1.80309	-5.28892	no	7.99146	7.93843	6.78917	-1.03745	-2.218	no
134-5p	6934	5206	2600	632.913	458.489	262.745	-1.38043	-17.6613	-1.74499	-23.4887	no	12.7616	12.3473	11.1548	-1.33271	-2.2855	no
320-5p	45	24	12	4.10746	2.11366	1.21267	-1.94329	-2.67709	-1.74298	-1.59176	no	5.48105	4.67034	3.50128	-1.75407	-2.24865	no
103-2-5p	26	20	10	2.3732	1.76139	1.01056	-1.34735	-1.00611	-1.74298	-1.45307	no	4.71722	4.27126	3.32193	-1.36222	-1.93098	no
466a-3p	85	94	47	7.75853	8.27852	4.74963	1.06702	0.433487	-1.74298	-3.15019	no	6.35041	6.70112	5.54425	1.27519	-2.22973	no
466e-3p	85	94	47	7.75853	8.27852	4.74963	1.06702	0.433487	-1.74298	-3.15019	no	6.45258	6.33829	5.82408	-1.08244	-1.42822	no
669b-3p	13	18	9	1.1866	1.58525	0.909503	1.33596	0.798579	-1.74298	-1.3785	no	3.8049	4.11328	3.16993	1.23832	-1.923	no
133a-3p	4	6	3	0.365107	0.528416	0.303168	1.44729	0.575993	-1.74298	-0.795879	no	2	2.58496	1.58496	1.5	-2	no
5109	3713	4366	2238	338.911	384.511	226.163	1.13455	5.65941	-1.70015	-20.6577	no	11.757	12.164	10.9743	1.32589	-2.281	no
539-5p	155	113	58	14.1479	9.95183	5.86124	-1.42164	-2.85881	-1.69791	-3.31586	no	7.16646	6.96963	5.85741	-1.14618	-2.16178	no
299-5p	509	335	172	46.4599	29.5032	17.3816	-1.57474	-6.51006	-1.69738	-5.70648	no	9.00521	8.49136	7.38689	-1.42786	-2.1502	no
301b-3p	226	109	56	20.6286	9.59956	5.65913	-2.14891	-6.72086	-1.6963	-3.25169	no	7.80071	6.93761	5.8072	-1.81895	-2.18921	no
5105	168	273	141	15.3345	24.0429	14.2489	1.5679	4.62521	-1.68736	-5.10238	no	7.3007	8.13517	7.13544	1.7832	-1.99963	no
487b-3p	1737	1415	736	158.548	124.618	74.3771	-1.27227	-6.74102	-1.67549	-11.4833	no	10.7973	10.5478	9.46398	-1.18879	-2.11958	no
501-5p	23	23	12	2.09937	2.02559	1.21267	-1.03642	-0.121317	-1.67036	-1.45654	no	4.50219	4.59356	3.50128	1.06538	-2.13211	no
331-3p	1725	1985	1037	157.452	174.818	104.795	1.11029	3.18005	-1.66819	-13.503	no	10.7831	11.0311	10.042	1.18755	-1.98493	no
34c-5p	5509	13388	7013	502.844	1179.07	708.705	2.34481	54.8894	-1.6637	-34.9242	no	12.4103	13.7985	12.7616	2.61764	-2.05178	no
210-5p	140	47	25	12.7788	4.13926	2.5264	-3.08721	-7.04655	-1.6384	-2.01483	no	7.04474	5.58455	4.58413	-2.75144	-2.00059	no
467a-3p	162	223	119	14.7868	19.6395	12.0257	1.32817	2.7584	-1.63313	-4.36414	no	7.26409	7.8513	6.83735	1.50234	-2.01943	no
22-3p	5059	7767	4160	461.769	684.034	420.393	1.48133	21.8957	-1.62713	-25.5963	no	12.2708	12.8307	12.0263	1.47408	-1.74639	no
666-3p	17	13	7	1.55171	1.1449	0.707391	-1.35532	-0.828386	-1.61848	-1.037	no	3.8049	3.16993	3.8049	-1.55291	1.55291	no
221-3p	11890	19531	10602	1085.28	1720.08	1071.39	1.58492	39.9706	-1.60546	-39.6396	no	13.3603	14.4122	13.3388	2.0732	-2.10433	no
379-3p	185	184	100	16.8862	16.2048	10.1056	-1.04205	-0.395671	-1.60354	-3.83637	no	7.50769	7.53134	6.64077	1.01653	-1.85391	no
879-5p	13	11	6	1.1866	0.968763	0.606335	-1.22486	-0.495943	-1.59773	-0.931758	no	3.8049	3.45943	2.65909	-1.27056	-1.74151	no
677-3p	4	11	6	0.365107	0.968763	0.606335	2.65336	1.73841	-1.59773	-0.931758	no	2	3.45943	2.65909	2.75	-1.74151	no
467d-3p	879	898	490	80.2323	79.0862	49.5174	-1.01449	-0.303242	-1.59714	-8.41319	no	9.68086	9.88522	8.82217	1.15218	-2.08935	no
143-3p	608	1299	711	55.4963	114.402	71.8507	2.06144	15.0456	-1.59222	-10.061	no	9.25427	10.3315	9.38657	2.11004	-1.92515	no
294-3p	48737	66295	36437	4448.56	5838.56	3682.17	1.31246	45.8284	-1.58563	-71.4878	no	15.4772	15.9237	15.2015	1.36273	-1.64966	no
126-5p	30	38	21	2.7383	3.34663	2.12217	1.22216	0.822797	-1.57698	-1.68976	no	4.86556	5.21569	4.33119	1.27468	-1.84613	no
3473d	11	18	10	1.00404	1.58525	1.01056	1.57886	1.20375	-1.56868	-1.15123	no	3.5222	4.11328	3.32193	1.50638	-1.7307	no
470-5p	97	55	31	8.85385	4.84381	3.13273	-1.82787	-3.62774	-1.54619	-1.95582	no	6.50601	5.81571	4.99144	-1.61362	-1.77064	no
467a-5p	1236	1834	1034	112.818	161.519	104.492	1.43168	9.80406	-1.54576	-11.2883	no	10.2112	10.9476	10.0339	1.66598	-1.88389	no
496-5p	13	7	4	1.1866	0.616485	0.404224	-1.92478	-1.42185	-1.52511	-0.678394	no	3.8049	2.80735	2	-1.99659	-1.75	no
mmu-let-7d-3p	23	14	8	2.09937	1.23297	0.808447	-1.70269	-1.58863	-1.52511	-0.959394	no	4.50219	3.8049	3	-1.62146	-1.74702	no
3076-3p	6	7	4	0.547661	0.616485	0.404224	1.12567	0.212901	-1.52511	-0.678394	no	2.49728	2.80735	2	1.23977	-1.75	no
337-3p	403	510	292	36.7846	44.9154	29.5083	1.22104	3.00133	-1.52212	-5.76696	no	8.61946	9.03877	8.1127	1.33729	-1.9001	no
350-3p	380	490	283	34.6852	43.154	28.5988	1.24416	3.20241	-1.50894	-5.54934	no	8.52921	9.00615	8.04248	1.39179	-1.95027	no
499-5p	1053	865	511	96.1145	76.18	51.6396	-1.26168	-5.077	-1.47522	-7.01283	no	9.98773	9.81539	8.87952	-1.12688	-1.91304	no
690	99	104	62	9.0364	9.15921	6.26547	1.01359	0.0961346	-1.46186	-2.38075	no	6.5574	6.87721	5.93856	1.24816	-1.91674	no
1949	131	150	90	11.9573	13.2104	9.09503	1.1048	0.833788	-1.45249	-2.81587	no	6.93761	7.34033	6.51126	1.322	-1.77655	no
302a-3p	100	83	50	9.12768	7.30975	5.0528	-1.2487	-1.49886	-1.44668	-2.07446	no	6.5781	6.43881	5.66748	-1.10136	-1.70684	no
140-5p	36	68	41	3.28596	5.98871	4.14329	1.82251	2.95595	-1.4454	-1.87366	no	5.11495	6.15561	5.39204	2.05717	-1.69769	no
mmu-let-7a-5p	26504	51480	31151	2419.2	4533.81	3147.99	1.87409	84.6048	-1.44022	-51.202	no	14.6629	15.7322	14.956	2.09848	-1.7126	no
669m-3p	15	28	17	1.36915	2.46594	1.71795	1.80107	1.86551	-1.4354	-1.18194	no	4.05476	4.85741	4.02727	1.7443	-1.77785	no
374c-5p	10	23	14	0.912768	2.02559	1.41478	2.21918	2.16062	-1.43174	-1.06442	no	3.96494	4.59356	3.32193	1.54608	-2.41434	no
329-3p	5941	3549	2184	542.275	312.558	220.706	-1.73496	-26.3064	-1.41617	-12.8606	no	12.5485	11.7959	10.9415	-1.68484	-1.80804	no
297a-3p	25	42	26	2.28192	3.69891	2.62745	1.62096	1.9308	-1.40779	-1.3773	no	4.62262	5.41495	4.62262	1.73187	-1.73187	no
297b-3p	25	42	26	2.28192	3.69891	2.62745	1.62096	1.9308	-1.40779	-1.3773	no	4.62262	5.41495	4.62262	1.73187	-1.73187	no
297c-3p	25	42	26	2.28192	3.69891	2.62745	1.62096	1.9308	-1.40779	-1.3773	no	4.98426	4.85741	5.04309	-1.09191	1.13736	no
361-5p	470	578	361	42.9001	50.9041	36.4812	1.18657	2.75767	-1.39535	-4.98926	no	8.89447	9.323	8.44597	1.34586	-1.8366	no
1247-5p	20	8	5	1.82554	0.704555	0.50528	-2.59105	-2.3628	-1.39439	-0.585852	no	4.39123	3	2.32193	-2.62301	-1.6	no
1194	8	8	5	0.730214	0.704555	0.50528	-1.03642	-0.0715488	-1.39439	-0.585852	no	2.93578	3	2.32193	1.04552	-1.6	no
669d-2-3p	3	8	5	0.27383	0.704555	0.50528	2.57296	1.44847	-1.39439	-0.585852	no	1	2.32193	3.16993	2.5	1.8	no
486-5p	10	32	20	0.912768	2.81822	2.02112	3.08755	3.2793	-1.39439	-1.17171	no	3.32193	5.05767	4.21911	3.33051	-1.78827	no
3107-5p	10	32	20	0.912768	2.81822	2.02112	3.08755	3.2793	-1.39439	-1.17171	no	4.84111	3.99409	3.96494	-1.79877	-1.02041	no
342-3p	2088	2046	1287	190.586	180.19	130.059	-1.0577	-1.80358	-1.38545	-9.2051	no	11.1032	11.1032	10.3207	1	-1.72016	no
669a-3p	420	664	419	38.3363	58.478	42.3424	1.5254	6.8234	-1.38107	-5.19743	no	8.67818	9.50636	8.65141	1.77544	-1.80869	no
669o-3p	420	664	419	38.3363	58.478	42.3424	1.5254	6.8234	-1.38107	-5.19743	no	8.67818	9.50636	8.65141	1.77544	-1.80869	no
29c-3p	478	658	416	43.6303	57.9496	42.0393	1.3282	4.73861	-1.37846	-5.14631	no	8.94241	9.48962	8.61591	1.46126	-1.83236	no
466b-3p	60	90	57	5.47661	7.92624	5.76019	1.44729	2.23082	-1.37604	-1.89373	no	5.89881	6.60257	5.82408	1.62875	-1.71534	no
466c-3p	60	90	57	5.47661	7.92624	5.76019	1.44729	2.23082	-1.37604	-1.89373	no	5.89881	6.60257	5.82408	1.62875	-1.71534	no
466p-3p	60	90	57	5.47661	7.92624	5.76019	1.44729	2.23082	-1.37604	-1.89373	no	6.31401	6.25873	5.69568	-1.03906	-1.47739	no
669f-3p	16	30	19	1.46043	2.64208	1.92006	1.80911	1.9432	-1.37604	-1.09334	no	4.05476	5.44285	2.87157	2.61732	-5.94336	no
204-5p	4	11	7	0.365107	0.968763	0.707391	2.65336	1.73841	-1.36949	-0.653023	no	2	3.45943	2.87157	2.75	-1.50302	no
362-5p	173	202	129	15.7909	17.79	13.0362	1.1266	1.15142	-1.36466	-2.76972	no	7.34033	7.62424	6.94597	1.21749	-1.60022	no
19b-3p	1306	1296	828	119.208	114.138	83.6743	-1.04442	-1.10856	-1.36407	-7.007	no	10.4362	10.3207	9.6647	-1.08335	-1.57566	no
467d-5p	560	750	489	51.115	66.052	49.4163	1.29222	4.60307	-1.33664	-5.00984	no	9.20893	9.6647	8.80205	1.37152	-1.81838	no
871-3p	43	23	15	3.9249	2.02559	1.51584	-1.93765	-2.60754	-1.33629	-0.876552	no	5.41495	4.59356	3.8049	-1.76711	-1.72747	no
143-5p	126	136	89	11.5009	11.9774	8.99398	1.04144	0.328373	-1.33172	-2.10832	no	6.86088	7.2377	6.48272	1.29848	-1.68762	no
15b-3p	55	87	57	5.02022	7.66203	5.76019	1.52623	2.47267	-1.33017	-1.67997	no	5.74573	6.55242	5.82408	1.74919	-1.65674	no
455-5p	114	128	84	10.4056	11.2729	8.4887	1.08335	0.621842	-1.32799	-2.02693	no	6.73239	7.13856	6.38872	1.32516	-1.68161	no
500-5p	8	3	2	0.730214	0.264208	0.202112	-2.76379	-1.56712	-1.30724	-0.294365	no	2.93578	1.58496	1	-2.55057	-1.5	no
883b-3p	10	6	4	0.912768	0.528416	0.404224	-1.72737	-1.07171	-1.30724	-0.416295	no	2.49728	2	3.32193	-1.41155	2.5	no
881-3p	74	55	37	6.75448	4.84381	3.73907	-1.39446	-1.87629	-1.29546	-1.22089	no	6.15561	5.81571	5.25384	-1.26567	-1.47618	no
465a-3p	155	89	60	14.1479	7.83817	6.06335	-1.805	-4.50532	-1.29271	-1.54123	no	7.16646	6.5781	5.90285	-1.50353	-1.59687	no
465b-3p	155	89	60	14.1479	7.83817	6.06335	-1.805	-4.50532	-1.29271	-1.54123	no	7.16646	6.5781	5.90285	-1.50353	-1.59687	no
465c-3p	155	89	60	14.1479	7.83817	6.06335	-1.805	-4.50532	-1.29271	-1.54123	no	7.16646	6.5781	5.90285	-1.50353	-1.59687	no
22-5p	352	458	309	32.1294	40.3357	31.2263	1.25541	3.21604	-1.29172	-3.48667	no	8.42272	8.92106	8.16281	1.41258	-1.69144	no
34a-5p	887	1351	916	80.9625	118.982	92.5672	1.46959	8.96399	-1.28535	-5.88093	no	9.71041	10.4499	9.85534	1.66954	-1.50998	no
187-3p	108	146	99	9.85789	12.8581	10.0045	1.30435	2.09965	-1.28523	-1.93249	no	6.64316	7.31029	6.60257	1.58791	-1.63322	no
1843b-5p	23	28	19	2.09937	2.46594	1.92006	1.17461	0.572513	-1.2843	-0.844024	no	4.50219	4.85741	4.15386	1.27918	-1.6285	no
3079-5p	25	47	32	2.28192	4.13926	3.23379	1.81394	2.44137	-1.28	-1.07986	no	4.62262	5.58455	5.04309	1.94791	-1.45544	no
mmu-let-7g-5p	7169	16112	10982	654.363	1418.97	1109.8	2.16848	55.9208	-1.27859	-19.923	no	12.8439	14.093	13.4191	2.37691	-1.59543	no
mmu-let-7e-5p	12230	19689	13433	1116.32	1734	1357.48	1.55332	38.5885	-1.27736	-21.9466	no	13.4191	14.4387	13.6556	2.02734	-1.72075	no
378-5p	8	19	13	0.730214	1.67332	1.31373	2.29154	2.02435	-1.27372	-0.673814	no	2.93578	4.21911	3.6201	2.43399	-1.51467	no
339-5p	246	269	185	22.4541	23.6906	18.6953	1.05507	0.607745	-1.2672	-2.48511	no	7.92857	8.1127	7.54167	1.13614	-1.48559	no
20b-5p	1508	1461	1005	137.645	128.669	101.561	-1.06976	-1.83747	-1.26691	-5.78675	no	10.5855	10.6279	9.99948	1.02989	-1.54591	no
290-3p	183	238	165	16.7037	20.9605	16.6742	1.25485	2.31397	-1.25706	-2.26328	no	7.50247	7.92857	7.35831	1.3436	-1.48479	no
122-5p	64	277	193	5.84172	24.3952	19.5038	4.17603	11.2062	-1.25079	-2.39165	no	5.98101	8.18773	7.63021	4.61625	-1.47173	no
700-5p	83	73	51	7.57597	6.42906	5.15385	-1.1784	-1.02418	-1.24743	-1.21389	no	5.89881	6.60257	5.82408	1.62875	-1.71534	no
146b-5p	2723	4669	3279	248.547	411.196	331.362	1.6544	21.1033	-1.24092	-9.49387	no	11.3804	12.2266	11.6976	1.79786	-1.443	no
712-3p	58	37	26	5.29405	3.25856	2.62745	-1.62466	-2.32925	-1.2402	-0.842836	no	5.82408	5.19628	4.62262	-1.54521	-1.48829	no
193b-3p	84	95	67	7.66725	8.36659	6.77075	1.09121	0.582998	-1.2357	-1.32905	no	6.31977	6.72368	6.03677	1.32309	-1.60983	no
434-3p	14518	9186	6512	1325.16	809.005	658.076	-1.63801	-37.4115	-1.22935	-12.7737	no	13.7985	13.3388	12.6631	-1.37524	-1.59744	no
221-5p	133	210	149	12.1398	18.4946	15.0573	1.52346	3.82703	-1.22828	-1.92297	no	6.97749	7.66721	7.17624	1.61297	-1.40539	no
191-3p	35	62	44	3.19469	5.4603	4.44646	1.70918	2.56571	-1.22801	-1.04382	no	5.04309	5.97337	5.45931	1.90564	-1.42807	no
425-5p	303	377	268	27.6569	33.2021	27.083	1.2005	2.37182	-1.22594	-2.55402	no	8.27798	8.71061	7.99146	1.34969	-1.64621	no
93-5p	6381	8871	6326	582.437	781.263	639.28	1.34137	17.9624	-1.2221	-12.2129	no	12.6631	13.0702	12.6272	1.32599	-1.35936	no
669j	4	7	5	0.365107	0.616485	0.50528	1.6885	0.845354	-1.22009	-0.340286	no	2	2.80735	2.32193	1.75	-1.4	no
222-5p	6	14	10	0.547661	1.23297	1.01056	2.25134	1.70915	-1.22009	-0.481237	no	2.49728	3.8049	3.32193	2.47531	-1.39761	no
21-5p	12698	28226	20201	1159.03	2485.84	2041.43	2.14476	73.2194	-1.2177	-21.4312	no	13.5698	14.833	14.093	2.40023	-1.67018	no
411-3p	809	741	532	73.8429	65.2594	53.7617	-1.13153	-2.43178	-1.21386	-3.41597	no	9.55722	9.62173	8.95529	1.04573	-1.58715	no
196a-5p	514	435	314	46.9163	38.3102	31.7316	-1.22464	-3.11595	-1.20732	-2.54805	no	9.03877	8.87281	8.18601	-1.12191	-1.60971	no
15a-3p	87	73	53	7.94108	6.42906	5.35596	-1.23519	-1.33324	-1.20036	-1.01336	no	6.38872	6.25873	5.74573	-1.09428	-1.42701	no
16-5p	3740	4010	2913	341.375	353.158	294.376	1.03452	1.49306	-1.19968	-7.48989	no	11.7959	12.0054	11.3683	1.15625	-1.55514	no
190b-5p	11	11	8	1.00404	0.968763	0.808447	-1.03642	-0.0838984	-1.1983	-0.389857	no	3.5222	3.45943	3	-1.04447	-1.375	no
743b-3p	42	44	32	3.83363	3.87505	3.23379	1.01081	0.0498212	-1.1983	-0.779715	no	5.34539	5.47564	5.04309	1.09448	-1.34962	no
1938	7	11	8	0.638938	0.968763	0.808447	1.51621	0.867071	-1.1983	-0.389857	no	2.69616	3.45943	3	1.69734	-1.375	no
466c-5p	46	68	50	4.19873	5.98871	5.0528	1.42631	1.86984	-1.18523	-0.913282	no	5.52356	6.15561	5.66748	1.54977	-1.40263	no
149-5p	13	23	17	1.1866	2.02559	1.71795	1.70706	1.55961	-1.17908	-0.515615	no	3.8049	4.59356	4.02727	1.72747	-1.48071	no
451	17	27	20	1.55171	2.37787	2.02112	1.53242	1.38915	-1.17651	-0.551603	no	4.21911	4.78112	4.21911	1.47633	-1.47633	no
188-5p	31	39	29	2.82958	3.4347	2.93062	1.21386	0.806682	-1.17201	-0.647969	no	5.41495	4.99862	4.58413	-1.33453	-1.33283	no
669h-5p	93	76	57	8.48874	6.69327	5.76019	-1.26825	-1.54044	-1.16199	-0.857634	no	6.35041	6.70112	5.54425	1.27519	-2.22973	no
215-5p	11	12	9	1.00404	1.05683	0.909503	1.05257	0.122764	-1.16199	-0.340788	no	3.69759	2.80735	3.6201	-1.85347	1.75656	no
671-5p	39	68	51	3.5598	5.98871	5.15385	1.68232	2.61896	-1.16199	-0.811241	no	5.26009	6.15561	5.69568	1.86029	-1.37548	no
297b-5p	14	28	21	1.27788	2.46594	2.12217	1.92972	2.04467	-1.16199	-0.520563	no	3.5222	4.50219	4.88948	1.97245	1.30794	no
211-5p	24	61	46	2.19064	5.37223	4.64857	2.45235	3.84895	-1.15567	-0.741564	no	4.58413	5.94247	5.52356	2.5639	-1.33691	no
532-3p	240	216	163	21.9064	19.023	16.4721	-1.15158	-1.50606	-1.15486	-1.38892	no	7.8824	7.77134	7.31029	-1.08002	-1.37654	no
181b-5p	1023	1160	879	93.3762	102.16	88.8281	1.09407	2.09704	-1.15009	-3.12985	no	9.9155	10.2319	9.81539	1.24522	-1.3347	no
106a-5p	772	799	606	70.4657	70.3674	61.2399	0.998605	-0.027664	-1.14905	-2.58128	no	9.50415	9.72071	9.14352	1.16196	-1.49194	no
1843-5p	18	13	10	1.64298	1.1449	1.01056	-1.43504	-0.997762	-1.13294	-0.296931	no	4.28299	3.69759	3.32193	-1.50046	-1.29743	no
152-3p	5501	4844	3752	502.114	426.608	379.162	-1.17699	-8.28178	-1.12513	-5.42558	no	12.3787	12.2708	11.9007	-1.07759	-1.29251	no
362-3p	343	374	290	31.3079	32.9379	29.3062	1.05206	0.67895	-1.12392	-1.49397	no	8.38264	8.67644	8.07289	1.22587	-1.51946	no
3102-3p.2-3p	19	9	7	1.73426	0.792624	0.707391	-2.188	-1.98478	-1.12049	-0.225867	no	4.34419	3.16993	2.87157	-2.25677	-1.22974	no
465a-5p	14	18	14	1.27788	1.58525	1.41478	1.24053	0.606035	-1.12049	-0.319424	no	3.96494	4.11328	3.7154	1.1083	-1.31757	no
491-5p	6	9	7	0.547661	0.792624	0.707391	1.44729	0.705444	-1.12049	-0.225867	no	2.49728	3.16993	2.87157	1.59399	-1.22974	no
1224-5p	195	306	238	17.799	26.9492	24.0513	1.51409	4.55959	-1.12049	-1.31704	no	7.60227	8.30849	7.8824	1.63152	-1.34358	no
33-3p	18	28	22	1.64298	2.46594	2.22323	1.50089	1.35334	-1.10917	-0.363841	no	4.28299	4.85741	4.39123	1.48908	-1.38145	no
15a-5p	432	415	329	39.4316	36.5488	33.2474	-1.07888	-1.10482	-1.0993	-1.28299	no	8.73455	8.82371	8.27798	1.06375	-1.45976	no
300-5p	9	5	4	0.821491	0.440347	0.404224	-1.86556	-1.13614	-1.08936	-0.127635	no	3.16993	2.32193	2	-1.8	-1.25	no
3072-5p	61	35	28	5.56789	3.08243	2.82957	-1.80633	-2.8293	-1.08936	-0.337691	no	5.93458	5.14942	4.75423	-1.72329	-1.31512	no
106b-5p	3635	4223	3383	331.791	371.917	341.872	1.12094	5.04951	-1.08788	-3.65236	no	11.6976	12.079	11.757	1.30267	-1.25005	no
466d-5p	43	31	25	3.9249	2.73015	2.5264	-1.43761	-1.54907	-1.08065	-0.288612	no	4.78987	5.14942	5.19628	1.28303	1.03301	no
30c-5p	1001	1460	1178	91.3681	128.581	119.044	1.40729	8.36704	-1.08012	-1.96845	no	9.87462	10.6046	10.1514	1.65857	-1.36907	no
324-5p	221	234	189	20.1722	20.6082	19.0996	1.02162	0.228003	-1.07899	-0.777555	no	7.76366	7.89871	7.55702	1.09813	-1.26724	no
3096b-3p	55	21	17	5.02022	1.84946	1.71795	-2.71443	-4.05664	-1.07655	-0.22613	no	5.74573	4.39123	4.02727	-2.5571	-1.28695	no
465b-5p	17	21	17	1.55171	1.84946	1.71795	1.19189	0.538726	-1.07655	-0.22613	no	4.21911	4.39123	4.02727	1.12671	-1.28695	no
467e-3p	47	53	43	4.29001	4.66767	4.3454	1.08803	0.421225	-1.07416	-0.348652	no	5.89881	4.85741	5.78546	-2.05822	1.9027	no
222-3p	3838	4284	3480	350.32	377.289	351.675	1.07698	3.33821	-1.07284	-3.08197	no	11.8248	12.1204	11.8248	1.22737	-1.22737	no
16-2-3p	108	169	138	9.85789	14.8837	13.9457	1.50983	3.36804	-1.06726	-0.567471	no	6.64316	7.4399	7.05166	1.73717	-1.3088	no
1981-3p	10	11	9	0.912768	0.968763	0.909503	1.06135	0.136283	-1.06516	-0.140459	no	3.32193	3.45943	3.16993	1.1	-1.22222	no
345-5p	439	448	372	40.0705	39.4551	37.5928	-1.0156	-0.230492	-1.04954	-0.689364	no	8.77322	8.90942	8.49136	1.09901	-1.33613	no
30a-3p	1329	1012	841	121.307	89.1262	84.988	-1.36107	-7.41866	-1.04869	-1.01904	no	10.4499	10.0339	9.72071	-1.33421	-1.24242	no
3471	9	6	5	0.821491	0.528416	0.50528	-1.55463	-0.843998	-1.04579	-0.0739446	no	3.16993	2.58496	2.32193	-1.5	-1.2	no
669p-3p	4	6	5	0.365107	0.528416	0.50528	1.44729	0.575993	-1.04579	-0.0739446	no	2	2.58496	2.32193	1.5	-1.2	no
5126	401	209	175	36.602	18.4065	17.6848	-1.98854	-8.21699	-1.04081	-0.390395	no	8.61591	7.65038	7.4399	-1.95279	-1.15707	no
294-5p	12501	9559	8004	1141.05	841.855	808.851	-1.3554	-22.479	-1.0408	-2.64084	no	13.4984	13.3858	12.9277	-1.08112	-1.37377	no
23b-3p	1162	1126	946	106.064	99.1661	95.5989	-1.06956	-1.60842	-1.03731	-0.830724	no	10.1258	10.2112	9.89576	1.06097	-1.24441	no
147-3p	13	13	11	1.1866	1.1449	1.11161	-1.03642	-0.0912072	-1.02994	-0.0720221	no	3.69759	3.54312	3.6201	-1.11301	1.05481	no
410-3p	734	577	491	66.9972	50.816	49.6184	-1.31843	-4.98458	-1.02414	-0.388441	no	9.46398	9.27685	8.82525	-1.13849	-1.36756	no
676-5p	200	149	127	18.2554	13.1223	12.8341	-1.39117	-3.06459	-1.02246	-0.183905	no	7.65038	7.3287	6.91452	-1.24978	-1.33254	no
138-5p	1020	1017	867	93.1023	89.5665	87.6155	-1.03948	-0.873825	-1.02227	-0.476485	no	9.90742	10.042	9.79084	1.09776	-1.19015	no
465c-5p	116	96	82	10.5881	8.45465	8.28658	-1.25234	-1.63427	-1.02028	-0.133534	no	6.74579	6.74579	6.31977	1	-1.34351	no
667-3p	256	84	72	23.3669	7.39782	7.27603	-3.15861	-9.6594	-1.01674	-0.103368	no	8.02265	6.45258	6.16554	-2.96918	-1.22014	no
20a-3p	18	14	12	1.64298	1.23297	1.21267	-1.33254	-0.808406	-1.01674	-0.0421996	no	4.28299	3.8049	3.50128	-1.39291	-1.23424	no
344b-3p	7	14	12	0.638938	1.23297	1.21267	1.92972	1.4458	-1.01674	-0.0421996	no	2.69616	3.8049	3.50128	2.15657	-1.23424	no
146a-5p	8	22	19	0.730214	1.93753	1.92006	2.65336	2.45848	-1.00909	-0.0289089	no	2.93578	4.50219	4.15386	2.96165	-1.27308	no
154-5p	1003	792	687	91.5506	69.7509	69.4254	-1.31254	-5.7391	0.995333	-0.0897188	no	9.88522	9.71041	9.34298	-1.12882	-1.29006	no
542-5p	170	136	118	15.5171	11.9774	11.9246	-1.29552	-2.25687	0.995589	-0.0351383	no	7.3287	7.2377	6.81592	-1.06511	-1.33959	no
674-5p	15295	13240	11523	1396.08	1166.04	1164.47	-1.19728	-15.1985	0.998653	-0.10586	no	13.9026	13.7626	13.4984	-1.10195	-1.20095	no
679-5p	9	8	7	0.821491	0.704555	0.707391	-1.16597	-0.316325	1.00403	0.00776398	no	3.16993	3	2.87157	-1.125	-1.0931	no
376a-3p	20472	12317	10780	1868.62	1084.75	1089.38	-1.72263	-48.3177	1.00427	0.323304	no	14.4122	13.6556	13.3858	-1.68949	-1.20563	no
301a-3p	180	115	101	16.4298	10.128	10.2066	-1.62222	-4.0923	1.00777	0.0567434	no	7.4838	6.98715	6.65037	-1.41093	-1.26294	no
1249-5p	39	17	15	3.5598	1.49718	1.51584	-2.37767	-3.0742	1.01246	0.034966	no	5.26009	3.99409	3.8049	-2.40493	-1.14013	no
466f-3p	248	189	168	22.6366	16.6451	16.9774	-1.35996	-3.19676	1.01996	0.186421	no	7.94612	7.57738	7.36971	-1.29123	-1.15482	no
1a-3p	434	559	498	39.6141	49.2307	50.3258	1.24276	3.40381	1.02224	0.357051	no	8.75635	9.14352	8.86611	1.30783	-1.21202	no
466h-3p	86	83	74	7.84981	7.30975	7.47814	-1.07388	-0.463341	1.02304	0.142448	no	6.36836	6.43881	6.20835	1.05004	-1.17321	no
370-5p	93	69	62	8.48874	6.07678	6.26547	-1.39691	-2.11359	1.03105	0.174745	no	6.45258	6.1786	5.93856	-1.20914	-1.18103	no
1943-3p	7	10	9	0.638938	0.880693	0.909503	1.37837	0.653973	1.03271	0.0700604	no	2.69616	3.32193	3.16993	1.54303	-1.11111	no
3063-3p	5	10	9	0.456384	0.880693	0.909503	1.92972	1.22192	1.03271	0.0700604	no	2.32193	3.32193	3.16993	2	-1.11111	no
383-5p	3	10	9	0.27383	0.880693	0.909503	3.2162	1.87727	1.03271	0.0700604	no	1.58496	3.32193	3.16993	3.33333	-1.11111	no
665-5p	43	31	28	3.9249	2.73015	2.82957	-1.43761	-1.54907	1.03641	0.137195	no	4.21911	5.41495	5.41495	2.29079	1	no
543-5p	64	42	38	5.84172	3.69891	3.84012	-1.57931	-2.32134	1.03818	0.167354	no	5.98101	5.41495	5.28509	-1.48047	-1.09419	no
23a-3p	8095	9784	8858	738.886	861.67	895.153	1.16618	10.246	1.03886	2.60061	no	13.0702	13.4191	13.0702	1.2736	-1.2736	no
26a-5p	7091	8697	7894	647.244	765.939	797.735	1.18339	10.5397	1.04151	2.61769	no	12.8307	12.9841	12.9097	1.11223	-1.0529	no
1940	24	11	10	2.19064	0.968763	1.01056	-2.26128	-2.30358	1.04314	0.0966802	no	4.58413	3.45943	3.32193	-2.18055	-1.1	no
539-3p	24	11	10	2.19064	0.968763	1.01056	-2.26128	-2.30358	1.04314	0.0966802	no	4.58413	3.45943	3.32193	-2.18055	-1.1	no
101b-5p	8	11	10	0.730214	0.968763	1.01056	1.32668	0.610389	1.04314	0.0966802	no	2.93578	3.45943	3.32193	1.43758	-1.1	no
297a-5p	15	22	20	1.36915	1.93753	2.02112	1.41513	1.04217	1.04314	0.136726	no	4.05476	4.50219	4.21911	1.3636	-1.21679	no
495-3p	9321	5631	5175	850.791	495.918	522.964	-1.71559	-32.3799	1.05454	2.75859	no	13.1686	12.462	12.3787	-1.6319	-1.05949	no
139-5p	37	39	36	3.37724	3.4347	3.63801	1.01701	0.0735157	1.05919	0.248848	no	5.19628	5.28509	5.19628	1.06349	-1.06349	no
466i-3p	15	16	15	1.36915	1.40911	1.51584	1.02918	0.0800425	1.07574	0.203194	no	4.05476	3.90475	3.8049	-1.10958	-1.07166	no
483-3p	29	17	16	2.64703	1.49718	1.61689	-1.76801	-1.89091	1.07996	0.220903	no	3.32193	5.05767	4.21911	3.33051	-1.78827	no
674-3p	505	720	678	46.0948	63.4099	68.5159	1.37564	5.51794	1.08052	1.4476	no	8.98806	9.59193	9.31909	1.51979	-1.20818	no
322-3p	2022	1833	1729	184.562	161.431	174.726	-1.14328	-4.15547	1.08235	2.36141	no	11.0311	10.9415	10.6539	-1.06404	-1.22063	no
340-5p	5568	3693	3486	508.229	325.24	352.281	-1.56263	-21.2126	1.08314	3.38352	no	12.4336	11.9007	11.8456	-1.44689	-1.03895	no
376c-3p	905	575	544	82.6055	50.6399	54.9744	-1.63123	-9.26775	1.0856	1.37356	no	9.73832	9.2569	9.00615	-1.39612	-1.18982	no
1969	10	19	18	0.912768	1.67332	1.81901	1.83323	1.5752	1.08707	0.253883	no	4.39123	4.50219	2.32193	1.07995	-4.53234	no
1186	264	267	255	24.0971	23.5145	25.7693	-1.02477	-0.281976	1.09589	1.0461	no	8.07289	8.10028	7.95381	1.01917	-1.10686	no
673-3p	34	24	23	3.10341	2.11366	2.32429	-1.46826	-1.4495	1.09965	0.325658	no	4.99862	4.67034	4.48081	-1.25552	-1.14039	no
99b-5p	1968	3074	2958	179.633	270.725	298.923	1.5071	14.3099	1.10416	3.84911	no	10.9743	11.6976	11.3804	1.65086	-1.24592	no
7a-1-3p	137	144	139	12.5049	12.682	14.0468	1.01416	0.117809	1.10762	0.859967	no	7.0115	7.29921	7.06985	1.2207	-1.17231	no
33-5p	7202	4857	4697	657.376	427.753	474.66	-1.53681	-23.3284	1.10966	5.08802	no	12.9097	12.2901	12.2266	-1.53653	-1.04495	no
1306-5p	270	128	124	24.6447	11.2729	12.5309	-2.1862	-7.47587	1.1116	0.84006	no	8.1127	7.13856	6.90303	-1.96447	-1.17734	no
455-3p	168	101	98	15.3345	8.895	9.90348	-1.72395	-4.37911	1.11338	0.757789	no	7.3007	6.81387	6.57568	-1.40136	-1.17951	no
669o-5p	45	46	45	4.10746	4.05119	4.54752	-1.01389	-0.0657877	1.12251	0.551512	no	5.59953	4.99862	5.78546	-1.51668	1.72529	no
295-3p	68740	78413	77838	6274.37	6905.78	7865.99	1.10063	18.4193	1.13904	25.8443	no	16.0848	16.5054	16.1911	1.33854	-1.24342	no
367-5p	11	2	2	1.00404	0.176139	0.202112	-5.70031	-2.56104	1.14746	0.137658	no	2.93578	1.58496	2	-2.55057	1.33333	no
1933-5p	8	3	3	0.730214	0.264208	0.303168	-2.76379	-1.56712	1.14746	0.168596	no	1.58496	3	1.58496	2.66667	-2.66667	no
466n-3p	11	5	5	1.00404	0.440347	0.50528	-2.28012	-1.57179	1.14746	0.217657	no	3.5222	2.32193	2.32193	-2.29783	1	no
471-5p	11	6	6	1.00404	0.528416	0.606335	-1.9001	-1.28662	1.14746	0.238431	no	3.5222	2.58496	2.65909	-1.91485	1.05273	no
298-3p	104	63	63	9.49279	5.54837	6.36652	-1.71092	-3.40435	1.14746	0.772606	no	6.60722	5.99988	5.97716	-1.52344	-1.01588	no
1933-3p	11	7	7	1.00404	0.616485	0.707391	-1.62866	-1.01885	1.14746	0.257535	no	3.32193	2	3.4136	-2.5	2.66401	no
3062-3p	6	5	5	0.547661	0.440347	0.50528	-1.2437	-0.360885	1.14746	0.217657	no	2.69616	2	2.32193	-1.62019	1.25	no
136-3p	374	316	316	34.1375	27.8299	31.9337	-1.22665	-2.67827	1.14746	1.73036	no	8.49136	8.37337	8.20104	-1.08522	-1.12688	no
412-3p	23	20	20	2.09937	1.76139	2.02112	-1.19188	-0.574864	1.14746	0.435314	no	3.69759	4.59356	4.75423	1.86086	1.11781	no
5123	5	5	5	0.456384	0.440347	0.50528	-1.03642	-0.0565643	1.14746	0.217657	no	3.5222	1	1	-5.74456	1	no
702	5	5	5	0.456384	0.440347	0.50528	-1.03642	-0.0565643	1.14746	0.217657	no	2.32193	2.32193	2.32193	1	1	no
664-3p	26	28	28	2.3732	2.46594	2.82957	1.03908	0.140766	1.14746	0.51507	no	4.71722	4.85741	4.75423	1.10205	-1.07414	no
3064-5p	4	6	6	0.365107	0.528416	0.606335	1.44729	0.575993	1.14746	0.238431	no	2.49728	2.32193	2.32193	-1.12924	1	no
466b-5p	9	14	14	0.821491	1.23297	1.41478	1.50089	0.956955	1.14746	0.364209	no	4.21911	3.69759	2.87157	-1.43547	-1.77278	no
466o-5p	9	14	14	0.821491	1.23297	1.41478	1.50089	0.956955	1.14746	0.364209	no	3.8049	3.32193	3.7154	-1.39761	1.31356	no
5114	3	5	5	0.27383	0.440347	0.50528	1.6081	0.656627	1.14746	0.217657	no	1.58496	2.32193	2.32193	1.66667	1	no
297c-5p	8	16	16	0.730214	1.40911	1.61689	1.92972	1.54563	1.14746	0.389356	no	3.69759	3.32193	4.11328	-1.29743	1.7307	no
202-5p	2	6	6	0.182554	0.528416	0.606335	2.89458	1.36385	1.14746	0.238431	no	2.69616	1.58496	2	-2.16025	1.33333	no
466e-5p	2	6	6	0.182554	0.528416	0.606335	2.89458	1.36385	1.14746	0.238431	no	2.69616	1.58496	2	-2.16025	1.33333	no
135a-2-3p	3	20	20	0.27383	1.76139	2.02112	6.4324	3.45953	1.14746	0.435314	no	1.58496	4.27126	4.21911	6.4366	-1.03681	no
30a-5p	6911	8184	8186	630.814	720.759	827.244	1.14259	8.16801	1.14774	8.82542	no	12.7328	12.9277	12.9841	1.14467	1.03988	no
770-3p	533	247	248	48.6505	21.7531	25.0619	-2.23649	-10.7418	1.1521	1.57642	no	9.1337	8.00773	7.93843	-2.18248	-1.04921	no
363-3p	5020	3201	3217	458.21	281.91	325.097	-1.62538	-21.6909	1.15319	5.71512	no	12.2266	11.7263	11.6181	-1.41454	-1.07789	no
126-3p	27	46	47	2.46447	4.05119	4.74963	1.64384	2.07131	1.1724	0.767705	no	4.77238	5.54425	5.54425	1.70748	1	no
467b-5p	17	42	43	1.55171	3.69891	4.3454	2.38377	3.11785	1.17478	0.743296	no	5.41495	4.99862	4.75423	-1.33453	-1.18459	no
376b-5p	28	35	36	2.55575	3.08243	3.63801	1.20607	0.740084	1.18024	0.698924	no	5.44285	4.78112	4.75423	-1.58198	-1.01882	no
136-5p	1741	921	949	158.913	81.1118	95.9021	-1.95918	-16.8196	1.18234	3.6256	no	10.8153	9.9155	9.90742	-1.86581	-1.00562	no
380-3p	930	690	715	84.8874	60.7678	72.255	-1.39691	-6.68399	1.18903	3.24859	no	9.79084	9.55722	9.40052	-1.17578	-1.11473	no
302d-5p	44	27	28	4.01618	2.37787	2.82957	-1.68898	-2.16858	1.18996	0.64561	no	5.54425	4.11328	5.0936	-2.69627	1.9729	no
34a-3p	128	103	107	11.6834	9.07114	10.813	-1.28798	-1.91701	1.19202	1.27411	no	6.90878	6.8453	6.70112	-1.04498	-1.10511	no
872-3p	1012	923	959	92.3721	81.288	96.9126	-1.13636	-2.81053	1.19221	3.81791	no	9.89576	9.91946	9.91946	1.01657	1	no
301b-5p	98	51	53	8.94513	4.49154	5.35596	-1.99155	-4.06936	1.19246	0.898504	no	6.5165	5.677	5.74573	-1.78943	1.04879	no
148a-5p	17	21	22	1.55171	1.84946	2.22323	1.19189	0.538726	1.2021	0.604202	no	3.96494	4.39123	4.58413	1.34377	1.14306	no
1983	1151	1530	1618	105.06	134.746	163.508	1.28257	6.39504	1.21346	5.43434	no	10.1095	10.6539	10.5478	1.45836	-1.07634	no
379-5p	5810	5551	5980	530.318	488.873	604.314	-1.08478	-4.33797	1.23614	11.3986	no	12.462	12.4103	12.5654	-1.03653	1.11356	no
598-3p	1178	1312	1420	107.524	115.547	143.499	1.07461	1.79334	1.24191	5.6691	no	10.1514	10.3904	10.3904	1.18023	1	no
669l-3p	12	12	13	1.09532	1.05683	1.31373	-1.03642	-0.087629	1.24308	0.544619	no	3.16993	3.8049	3.7154	1.55291	-1.06399	no
130b-3p	6245	3704	4037	570.024	326.209	407.963	-1.74742	-27.2694	1.25062	9.85136	yes	12.6272	11.9073	11.99	-1.64712	1.05899	no
883b-5p	4	11	12	0.365107	0.968763	1.21267	2.65336	1.73841	1.25177	0.539101	no	2	3.45943	3.50128	2.75	1.02943	no
135b-5p	413	330	361	37.6973	29.0629	36.4812	-1.2971	-3.53309	1.25525	2.99144	yes	8.64795	8.45268	8.44597	-1.14494	-1.00466	no
714	42	21	23	3.83363	1.84946	2.32429	-2.07284	-2.78815	1.25674	0.758786	no	5.34539	4.39123	4.48081	-1.93746	1.06406	no
466f	7	21	23	0.638938	1.84946	2.32429	2.89458	2.55153	1.25674	0.758786	no	2.69616	4.39123	4.48081	3.23792	1.06406	no
18b-3p	141	92	101	12.87	8.10238	10.2066	-1.58843	-3.48366	1.25971	1.60558	no	7.05166	6.64316	6.65037	-1.3273	1.00501	no
30e-3p	1350	883	970	123.224	77.7652	98.0242	-1.58456	-10.73	1.26052	4.98892	yes	10.4767	9.87462	9.94781	-1.5179	1.05204	no
378-3p	4776	4938	5428	435.938	434.886	548.531	0.997587	-0.119042	1.26132	11.8347	no	12.164	12.2994	12.4336	1.09841	1.09748	no
615-5p	10	10	11	0.912768	0.880693	1.11161	-1.03642	-0.079994	1.2622	0.534149	no	3.32193	3.32193	3.4136	1	1.0656	no
410-5p	52	39	43	4.74639	3.4347	4.3454	-1.38189	-1.53362	1.26515	1.06605	no	5.677	5.28509	5.41495	-1.31213	1.09419	no
3072-3p	77	19	21	7.02831	1.67332	2.12217	-4.20023	-6.09582	1.26824	0.75229	no	6.1953	4.21911	4.33119	-3.93453	1.08079	no
18b-5p	285	211	234	26.0139	18.5826	23.6471	-1.3999	-3.72164	1.27254	2.54486	yes	8.18773	7.69802	7.8513	-1.40416	1.1121	no
503-5p	4309	3574	3976	393.312	314.76	401.798	-1.24956	-9.86951	1.27652	10.6199	no	12.079	11.8248	11.9802	-1.19272	1.11372	no
101a-3p	17313	22192	24763	1580.28	1954.43	2502.45	1.23677	21.0147	1.28039	26.8372	no	14.2062	14.6629	14.3425	1.37232	-1.24867	no
328-3p	153	119	133	13.9654	10.4802	13.4404	-1.33254	-2.3569	1.28245	1.97664	yes	7.13231	7.02314	6.98715	-1.07861	-1.02526	no
24-3p	2868	3660	4096	261.782	322.334	413.925	1.23131	8.36004	1.28415	11.0261	no	11.5149	11.8572	12.0054	1.26773	1.10819	no
1968-5p	459	481	539	41.8961	42.3613	54.4691	1.01111	0.169269	1.28582	4.01867	no	8.8463	8.98806	8.98806	1.10325	1	no
425-3p	127	98	111	11.5922	8.63079	11.2172	-1.34312	-2.20196	1.29967	1.89642	no	6.87951	6.78917	6.73909	-1.06462	-1.03532	no
770-5p	57	22	25	5.20278	1.93753	2.5264	-2.68527	-4.09743	1.30393	0.910499	no	5.8072	4.50219	4.58413	-2.47087	1.05844	no
219-5p	300	274	313	27.383	24.131	31.6305	-1.13477	-1.51396	1.31078	3.28115	no	8.25352	8.16677	8.17072	-1.06197	1.00275	no
205-3p	11	7	8	1.00404	0.616485	0.808447	-1.62866	-1.01885	1.31138	0.525384	no	3.5222	2.80735	3	-1.6413	1.14286	no
378b	9	7	8	0.821491	0.616485	0.808447	-1.33254	-0.571629	1.31138	0.525384	no	3.16993	2.80735	3	-1.28571	1.14286	no
350-5p	33	28	32	3.01213	2.46594	3.23379	-1.22149	-0.779991	1.31138	1.05077	no	4.62262	5.41495	4.62262	1.73187	-1.73187	no
1935	22	61	70	2.00809	5.37223	7.07391	2.67529	4.11854	1.31676	1.57598	no	4.48081	5.94247	6.11178	2.75425	1.12452	no
17-5p	1627	1552	1782	148.507	136.684	180.082	-1.0865	-2.3391	1.31751	7.96761	no	10.6906	10.6737	10.6906	-1.01178	1.01178	no
466n-5p	122	74	85	11.1358	6.51713	8.58975	-1.70869	-3.67956	1.31803	1.74233	no	6.83735	6.31689	6.42485	-1.43441	1.0777	no
676-3p	1430	869	1000	130.526	76.5322	101.056	-1.7055	-12.5604	1.32044	6.01321	yes	10.5088	9.82504	9.98773	-1.60632	1.11937	no
324-3p	57	65	75	5.20278	5.72451	7.57919	1.10028	0.526833	1.32399	1.66156	no	5.8072	6.05864	6.25873	1.19039	1.14877	no
369-3p	1026	811	936	93.65	71.4242	94.5883	-1.31118	-5.78399	1.32432	5.87481	yes	9.91946	9.73832	9.87462	-1.13378	1.09908	no
532-5p	511	574	664	46.6424	50.5518	67.1011	1.08382	1.32375	1.32737	4.98585	no	9.00709	9.25164	9.27685	1.18472	1.01763	no
669a-5p	205	251	291	18.7117	22.1054	29.4073	1.18136	1.77254	1.33032	3.32466	no	7.70032	8.04518	8.0902	1.27003	1.0317	no
669p-5p	205	251	291	18.7117	22.1054	29.4073	1.18136	1.77254	1.33032	3.32466	no	7.70032	8.04518	8.0902	1.27003	1.0317	no
421-3p	309	255	296	28.2045	22.4577	29.9125	-1.2559	-2.69901	1.33195	3.36649	yes	8.30237	8.07289	8.13517	-1.17242	1.04411	no
148a-3p	2043	2143	2492	186.479	188.733	251.831	1.01209	0.388607	1.33433	9.8254	no	11.0667	11.1548	11.1032	1.06294	-1.0364	no
411-5p	2800	3002	3501	255.575	264.384	353.797	1.03447	1.29004	1.33819	11.7548	no	11.4117	11.6181	11.8572	1.15378	1.18025	no
669h-3p	3	6	7	0.27383	0.528416	0.707391	1.92972	0.946499	1.3387	0.526173	no	1.58496	2.58496	2.87157	2	1.21977	no
669a-3-3p	15	17	20	1.36915	1.49718	2.02112	1.09351	0.252425	1.34995	0.913035	no	4.05476	3.99409	4.21911	-1.04295	1.16879	no
20a-5p	829	748	889	75.6685	65.8759	89.8387	-1.14865	-2.75046	1.36376	6.27824	no	9.60683	9.65416	9.82504	1.03335	1.12575	no
669b-5p	14	21	25	1.27788	1.84946	2.5264	1.44729	1.07758	1.36602	1.05799	no	4.21911	4.39123	4.39123	1.12671	1	no
101c	12310	15168	18085	1123.62	1335.84	1827.6	1.18887	14.2878	1.36813	28.6078	no	13.4412	13.9795	13.9795	1.45227	1	no
219-2-3p	62	41	49	5.65916	3.61084	4.95174	-1.56727	-2.25106	1.37135	1.49824	no	5.94638	5.35727	5.63881	-1.50432	1.21549	no
1934-3p	670	619	740	61.1555	54.5149	74.7814	-1.12181	-2.06299	1.37176	5.82759	no	9.34298	9.42315	9.48962	1.05715	1.04715	no
30d-3p	6	5	6	0.547661	0.440347	0.606335	-1.2437	-0.360885	1.37695	0.530505	no	2.49728	2.32193	2.65909	-1.12924	1.26327	no
712-5p	43	40	48	3.9249	3.52277	4.85068	-1.11415	-0.492306	1.37695	1.5005	no	5.41495	5.34539	5.59953	-1.04939	1.19262	no
190-5p	7	10	12	0.638938	0.880693	1.21267	1.37837	0.653973	1.37695	0.750247	no	2.69616	3.32193	3.50128	1.54303	1.13237	no
5620-5p	3	5	6	0.27383	0.440347	0.606335	1.6081	0.656627	1.37695	0.530505	no	1.58496	2.32193	2.65909	1.66667	1.26327	no
664-5p	383	342	412	34.959	30.1197	41.635	-1.16067	-2.00461	1.38232	4.44534	no	8.58039	8.52921	8.58652	-1.03611	1.04052	no
582-3p	55	39	47	5.02022	3.4347	4.74963	-1.46162	-1.82396	1.38283	1.503	no	5.74573	5.28509	5.54425	-1.37616	1.19678	no
377-3p	155	97	117	14.1479	8.54272	11.8235	-1.65614	-3.93821	1.38405	2.3773	yes	7.16646	6.77602	6.81182	-1.31079	1.02513	no
381-3p	231	133	161	21.0849	11.7132	16.27	-1.8001	-5.47873	1.38903	2.81705	yes	7.83264	7.2056	7.29772	-1.54439	1.06593	no
218-2-3p	12	23	28	1.09532	2.02559	2.82957	1.84931	1.75382	1.39691	1.19334	no	3.8049	3.8049	5.19628	1	2.6233	no
452-5p	127	81	99	11.5922	7.13361	10.0045	-1.625	-3.44803	1.40245	2.26826	yes	6.87951	6.3917	6.60257	-1.40231	1.15738	no
32-5p	456	395	483	41.6222	34.7874	48.81	-1.19647	-2.61324	1.4031	5.01646	no	8.82217	8.77322	8.77322	-1.03451	1	no
293-3p	213912	213383	261718	19525.2	18792.5	26448.1	-1.03899	-12.6233	1.40738	119.071	no	17.6137	17.8205	17.8205	1.15408	1	no
300-3p	915	615	757	83.5183	54.1626	76.4993	-1.54199	-8.37082	1.4124	6.39238	yes	9.76833	9.40052	9.53328	-1.29039	1.09639	no
574-5p	82	73	90	7.4847	6.42906	9.09503	-1.1642	-0.94571	1.41468	2.21345	no	6.25873	6.25873	6.51126	1	1.19129	no
1843b-3p	14	21	26	1.27788	1.84946	2.62745	1.44729	1.07758	1.42066	1.20292	no	3.96494	4.39123	4.62262	1.34377	1.17397	no
205-5p	177	153	190	16.156	13.4746	19.2006	-1.199	-1.64632	1.42495	3.2773	no	7.41403	7.36401	7.56595	-1.03528	1.15024	no
30e-5p	4040	4084	5078	368.758	359.675	513.162	-1.02525	-1.12419	1.42674	17.0011	no	11.9073	12.0263	12.2994	1.08598	1.20845	no
299-3p	665	384	479	60.6991	33.8186	48.4058	-1.79484	-9.25692	1.43134	5.26358	yes	9.31909	8.73981	8.75635	-1.4941	1.01153	no
487b-5p	7	4	5	0.638938	0.352277	0.50528	-1.81373	-0.964004	1.43432	0.540609	no	2.49728	3	1	1.41688	-4	no
1950	21	12	15	1.91681	1.05683	1.51584	-1.81373	-1.6697	1.43432	0.936363	no	4.45844	3.54312	3.8049	-1.88598	1.19895	no
1955-3p	7	4	5	0.638938	0.352277	0.50528	-1.81373	-0.964004	1.43432	0.540609	no	2	2.32193	2.87157	1.25	1.46372	no
883a-3p	47	28	35	4.29001	2.46594	3.53696	-1.7397	-2.34919	1.43432	1.43032	no	5.54425	4.85741	5.15601	-1.60975	1.22995	no
200a-5p	17	12	15	1.55171	1.05683	1.51584	-1.46826	-1.02495	1.43432	0.936363	no	4.21911	3.54312	3.8049	-1.59769	1.19895	no
3108-5p	5	4	5	0.456384	0.352277	0.50528	-1.29552	-0.387048	1.43432	0.540609	no	1	2.58496	2.65909	3	1.05273	no
3068-5p	82	86	108	7.4847	7.57396	10.914	1.01193	0.076812	1.44099	2.54193	no	6.25873	6.49577	6.71497	1.17857	1.16409	no
872-5p	2172	2280	2871	198.253	200.798	290.131	1.01284	0.425434	1.44489	13.1956	no	11.1762	11.2717	11.2717	1.06846	1	no
196a-1-3p	60	59	75	5.47661	5.19609	7.57919	-1.05399	-0.286811	1.45863	2.18222	no	5.89881	5.89881	6.25873	1	1.28336	no
331-5p	28	44	56	2.55575	3.87505	5.65913	1.51621	1.73414	1.4604	1.89113	no	4.78987	5.47564	5.8072	1.60857	1.25837	no
103-3p	141722	123525	157523	12935.9	10878.8	15918.6	-1.1891	-44.8177	1.46328	101.444	no	17.1627	17.1193	16.9152	-1.03056	-1.15199	no
224-5p	191	123	157	17.4339	10.8325	15.8658	-1.6094	-4.15507	1.46464	3.18845	yes	7.55702	7.09699	7.23166	-1.37557	1.09784	no
107-3p	52500	45137	58184	4792.03	3975.18	5879.84	-1.20549	-29.2209	1.47914	62.9632	no	15.5655	15.6152	15.9237	1.03502	1.23843	no
291b-3p	37	31	40	3.37724	2.73015	4.04224	-1.23702	-0.875226	1.48059	1.6506	no	5.19628	4.99862	5.34539	-1.14684	1.27171	no
369-5p	534	409	528	48.7418	36.0204	53.3575	-1.35317	-4.62059	1.48132	6.00378	yes	9.14352	8.80888	8.91524	-1.26107	1.07651	no
194-5p	58	95	123	5.29405	8.36659	12.4299	1.58037	2.77051	1.48566	2.91715	no	5.82408	6.72368	6.87951	1.86555	1.11406	no
127-3p	34289	32299	41839	3129.79	2844.55	4228.08	-1.10028	-12.3472	1.48638	53.9552	no	14.956	15.1176	15.3585	1.11853	1.18175	no
376b-3p	5108	3906	5067	466.242	343.999	512.05	-1.35536	-14.3635	1.48852	18.8093	yes	12.2994	11.9528	12.2901	-1.27162	1.26338	yes
301a-5p	883	553	719	80.5974	48.7023	72.6592	-1.6549	-9.38789	1.4919	7.12043	yes	9.70346	9.11685	9.42315	-1.50172	1.23653	no
3102-3p	134	55	72	12.2311	4.84381	7.27603	-2.5251	-5.99326	1.50213	2.28775	yes	6.98895	5.81571	6.16554	-2.25518	1.2744	yes
124-3p	19018	17221	22546	1735.9	1516.64	2278.41	-1.14457	-12.8568	1.50227	40.5297	no	14.3425	14.1418	14.2062	-1.14926	1.04571	no
494-3p	4107	1411	1849	374.874	124.266	186.852	-3.01671	-37.6327	1.50365	11.6202	yes	11.9528	10.5194	10.7589	-2.70076	1.18058	no
409-5p	780	572	750	71.1959	50.3757	75.7919	-1.4133	-6.31565	1.50453	7.40997	yes	9.53328	9.20893	9.50857	-1.2521	1.23084	no
542-3p	265	241	317	24.1884	21.2247	32.0347	-1.13963	-1.46948	1.50931	4.85089	no	8.08012	7.95381	8.22406	-1.09149	1.20601	no
19a-3p	35	37	49	3.19469	3.25856	4.95174	1.01999	0.0839623	1.51961	1.93535	no	5.04309	5.19628	5.63881	1.11202	1.35898	no
501-3p	419	373	494	38.245	32.8499	49.9216	-1.16424	-2.13823	1.51969	6.14589	no	8.65488	8.65141	8.8463	-1.00241	1.14464	no
186-5p	1237	1400	1858	112.909	123.297	187.762	1.092	2.25629	1.52284	11.9726	no	10.2319	10.5088	10.7973	1.21159	1.22133	no
1839-5p	31210	28374	37738	2848.75	2498.88	3813.65	-1.14001	-16.0077	1.52614	54.2866	no	14.8813	14.8813	15.2901	1	1.32757	no
293-5p	46739	41570	55339	4266.19	3661.04	5592.33	-1.16529	-22.7576	1.52753	65.9121	no	15.2901	15.4772	15.7613	1.13844	1.21769	no
3070b-3p	8	3	4	0.730214	0.264208	0.404224	-2.76379	-1.56712	1.52994	0.560963	no	1.58496	1.58496	3.16993	1	3	no
326-5p	7	3	4	0.638938	0.264208	0.404224	-2.41831	-1.32168	1.52994	0.560963	no	2.32193	2	2.32193	-1.25	1.25	no
1966	7	3	4	0.638938	0.264208	0.404224	-2.41831	-1.32168	1.52994	0.560963	no	1	1	3.32193	1	5	no
877-3p	9	6	8	0.821491	0.528416	0.808447	-1.55463	-0.843998	1.52994	0.793322	no	3.16993	2.58496	3	-1.5	1.33333	no
365-1-5p	36	23	31	3.28596	2.02559	3.13273	-1.62222	-1.83012	1.54657	1.59703	no	5.11495	4.59356	4.99144	-1.43534	1.31757	no
1306-3p	258	120	162	23.5494	10.5683	16.3711	-2.2283	-7.44692	1.54907	3.66284	yes	8.04248	7.0482	7.3007	-1.99209	1.19127	no
24-2-5p	66	108	146	6.02427	9.51149	14.7542	1.57886	2.94858	1.55119	3.48695	no	6.03677	6.90878	7.16646	1.83021	1.19556	no
125a-3p	52	51	69	4.74639	4.49154	6.97286	-1.05674	-0.280084	1.55244	2.40105	no	5.677	5.677	6.07279	1	1.31566	no
493-3p	14	17	23	1.27788	1.49718	2.32429	1.17162	0.439311	1.55244	1.38624	no	3.96494	3.99409	4.48081	1.02041	1.40125	no
669f-5p	11	22	30	1.00404	1.93753	3.03168	1.92972	1.81241	1.56472	1.60836	no	3.32193	1	5.69568	-5	25.9144	no
124-5p	77	103	141	7.02831	9.07114	14.2489	1.29066	1.69826	1.57079	3.51362	no	6.1953	6.8453	7.13544	1.56917	1.22275	no
3062-5p	87	46	63	7.94108	4.05119	6.36652	-1.96019	-3.76202	1.57152	2.35076	yes	6.38872	5.54425	5.97716	-1.79561	1.34996	yes
18a-5p	441	415	570	40.2531	36.5488	57.6019	-1.10135	-1.41216	1.57603	7.11074	no	8.78443	8.82371	9.06002	1.0276	1.17798	no
466m-3p	6	8	11	0.547661	0.704555	1.11161	1.28648	0.46768	1.57776	0.989895	no	3.5222	2.80735	2.87157	-1.6413	1.04552	no
191-5p	39566	34054	46842	3611.46	2999.11	4733.66	-1.20418	-25.213	1.57835	64.7676	no	15.1176	15.2015	15.4772	1.05986	1.21056	no
3057-5p	123	131	181	11.227	11.5371	18.2911	1.02761	0.216971	1.58542	4.05318	no	6.8453	7.17135	7.50508	1.25357	1.26027	no
365-2-5p	193	175	242	17.6164	15.4121	24.4555	-1.14302	-1.28161	1.58677	4.69434	no	7.57738	7.46485	7.91081	-1.08112	1.36222	no
429-3p	680	470	655	62.0682	41.3926	66.1916	-1.4995	-6.80031	1.59912	7.83749	yes	9.36031	8.94241	9.2569	-1.33598	1.24357	no
450a-5p	201	197	275	18.3466	17.3497	27.7904	-1.05746	-0.557387	1.60178	5.09414	no	7.66721	7.60227	8.00773	-1.04604	1.32451	no
21-3p	120	154	215	10.9532	13.5627	21.727	1.23824	1.75827	1.60197	4.50525	no	6.81387	7.38689	7.75926	1.48763	1.29448	no
431-3p	361	313	438	32.9509	27.5657	44.2625	-1.19536	-2.3136	1.60571	6.45844	no	8.45268	8.32543	8.67993	-1.09221	1.27854	no
672-3p	13	10	14	1.1866	0.880693	1.41478	-1.34735	-0.711428	1.60644	1.15562	no	3.16993	3.8049	3.7154	1.55291	-1.06399	no
101a-5p	4	5	7	0.365107	0.440347	0.707391	1.20607	0.279725	1.60644	0.817147	no	1.58496	3	2.32193	2.66667	-1.6	no
540-5p	1576	903	1270	143.852	79.5266	128.341	-1.80886	-14.4104	1.61381	11.1006	yes	10.6279	9.89576	10.2642	-1.66115	1.29094	yes
669e-5p	21	22	31	1.91681	1.93753	3.13273	1.01081	0.0352289	1.61687	1.74026	no	4.45844	4.50219	4.99144	1.03079	1.40372	no
328-5p	242	144	203	22.089	12.682	20.5143	-1.74176	-5.34034	1.6176	4.45696	yes	7.89871	7.29921	7.67688	-1.51519	1.29924	yes
1955-5p	29	17	24	2.64703	1.49718	2.42534	-1.76801	-1.89091	1.61994	1.53653	no	4.84111	3.99409	4.52265	-1.79877	1.44249	no
669d-5p	65	81	115	5.93299	7.13361	11.6214	1.20236	1.10825	1.62911	3.39794	no	5.99988	6.3917	6.77602	1.31205	1.30524	no
183-3p	1465	1060	1514	133.721	93.3535	152.999	-1.43241	-8.96042	1.63892	12.4625	yes	10.5478	10.1514	10.4362	-1.31621	1.21824	no
341-5p	30	21	30	2.7383	1.84946	3.03168	-1.4806	-1.3882	1.63923	1.75477	no	4.86556	4.39123	4.88948	-1.38928	1.4125	no
326-3p	4	7	10	0.365107	0.616485	1.01056	1.6885	0.845354	1.63923	1.01312	no	2	2.80735	3.32193	1.75	1.42857	no
5102	196	67	96	17.8903	5.90064	9.70137	-3.03192	-8.24588	1.64412	3.15559	yes	7.60717	6.10822	6.55242	-2.82636	1.36056	yes
1195	24	16	23	2.19064	1.40911	2.32429	-1.55463	-1.37824	1.64947	1.55339	no	3.96494	4.85741	4.33119	1.85635	-1.44015	no
345-3p	728	652	939	66.4495	57.4212	94.8915	-1.15723	-2.71074	1.65255	9.95807	no	9.43903	9.46398	9.88522	1.01744	1.33908	no
423-3p	2818	2185	3155	257.218	192.431	318.831	-1.33667	-10.2171	1.65686	18.3374	yes	11.4421	11.1762	11.5682	-1.2024	1.31222	no
466h-5p	10	9	13	0.912768	0.792624	1.31373	-1.15158	-0.307421	1.65744	1.17766	no	3.8049	2.32193	3.7154	-2.79523	2.62711	no
129-1-3p	367	230	334	33.4986	20.2559	33.7527	-1.65377	-6.04506	1.66631	6.02423	yes	8.47115	7.8824	8.29626	-1.50394	1.33225	yes
101b-3p	21298	17828	25920	1944.01	1570.1	2619.37	-1.23815	-21.1022	1.66828	53.2307	no	14.5092	14.2273	14.4122	-1.21573	1.13671	no
28-5p	187	276	405	17.0688	24.3071	40.9276	1.42407	3.752	1.68377	6.75126	no	7.53134	8.1843	8.57425	1.57239	1.31035	no
484	688	578	849	62.7984	50.9041	85.7965	-1.23366	-3.72859	1.68545	9.7913	no	9.38657	9.323	9.73832	-1.04505	1.33359	no
150-5p	251	357	530	22.9105	31.4407	53.5596	1.37233	3.85855	1.70351	7.87258	no	8.00773	8.57425	8.94241	1.48095	1.2907	no
3098-5p	8	4	6	0.730214	0.352277	0.606335	-2.07284	-1.21685	1.72119	0.851609	no	2.93578	2	2.65909	-1.91293	1.57909	no
1199-3p	5	4	6	0.456384	0.352277	0.606335	-1.29552	-0.387048	1.72119	0.851609	no	2.32193	2.32193	2.32193	1	1	no
3091-5p	18	16	24	1.64298	1.40911	2.42534	-1.16597	-0.447352	1.72119	1.70322	no	4.28299	3.90475	4.52265	-1.29976	1.53464	no
5115	17	20	30	1.55171	1.76139	3.03168	1.13513	0.384473	1.72119	1.90426	no	4.21911	4.27126	4.88948	1.03681	1.53498	no
1231-5p	3	4	6	0.27383	0.352277	0.606335	1.28648	0.3307	1.72119	0.851609	no	1.58496	2	2.65909	1.33333	1.57909	no
450b-3p	199	153	231	18.1641	13.4746	23.3439	-1.34802	-2.78782	1.73244	5.33865	yes	7.63619	7.36401	7.83264	-1.20763	1.38379	no
132-3p	18	25	38	1.64298	2.20173	3.84012	1.34008	0.950368	1.74414	2.18804	no	4.28299	4.71722	5.28509	1.35118	1.48233	no
380-5p	113	79	121	10.3143	6.95748	12.2278	-1.48247	-2.70199	1.7575	3.95028	yes	6.71019	6.37402	6.86088	-1.2624	1.40139	yes
434-5p	248	185	284	22.6366	16.2928	28.6999	-1.38936	-3.40031	1.7615	6.07287	yes	7.94612	7.54934	8.04789	-1.31656	1.41279	yes
361-3p	58	56	86	5.29405	4.93188	8.69081	-1.07343	-0.378331	1.76217	3.3437	no	5.82408	5.84096	6.45258	1.01177	1.52797	no
127-5p	1101	1004	1543	100.496	88.4216	155.929	-1.13655	-2.93534	1.76347	14.1798	no	10.0339	9.99948	10.4767	-1.02412	1.39205	no
30d-5p	7471	6887	10615	681.929	606.533	1072.71	-1.12431	-7.02015	1.76859	37.3672	no	12.9841	12.7616	13.3603	-1.16672	1.51435	no
30c-2-3p	218	218	337	19.8983	19.1991	34.0558	-1.03642	-0.373499	1.77382	6.68481	no	7.75486	7.80071	8.30849	1.0323	1.42185	no
140-3p	104487	106787	165860	9537.24	9404.66	16761.1	-1.0141	-3.23245	1.78222	150.307	no	16.8515	16.8515	17.1193	1	1.20399	no
28-3p	312	383	597	28.4784	33.7305	60.3304	1.18443	2.22209	1.7886	9.00705	no	8.32543	8.72928	9.1337	1.32303	1.32356	no
1196-5p	37	46	72	3.37724	4.05119	7.27603	1.19956	0.825078	1.79602	3.14684	no	5.19628	5.54425	6.16554	1.27277	1.53825	no
449a-5p	113	63	99	10.3143	5.54837	10.0045	-1.85898	-4.00681	1.80315	3.71118	yes	6.71019	5.99988	6.60257	-1.63616	1.51854	yes
27a-3p	1763	2389	3787	160.921	210.398	382.699	1.30746	8.56484	1.81893	23.2437	no	10.8337	11.4117	11.9073	1.49283	1.40987	no
1965	4163	3984	6323	379.985	350.868	638.976	-1.08299	-3.59863	1.82113	30.0886	no	11.9802	11.9802	12.6047	1	1.54172	no
1249-3p	87	65	104	7.94108	5.72451	10.5098	-1.38721	-2.00526	1.83593	3.90189	yes	6.38872	6.05864	6.67146	-1.25708	1.52924	yes
3086-5p	37	23	37	3.37724	2.02559	3.73907	-1.66728	-1.94624	1.84591	2.34482	no	5.19628	4.59356	5.25384	-1.51858	1.58039	no
145-3p	19	23	37	1.73426	2.02559	3.73907	1.16799	0.50139	1.84591	2.34482	no	4.34419	4.59356	5.25384	1.18869	1.58039	no
183-5p	3649	2872	4635	333.069	252.935	468.394	-1.31682	-11.0696	1.85184	26.3642	yes	11.7263	11.5682	12.164	-1.1158	1.5113	no
342-5p	470	301	486	42.9001	26.5089	49.1132	-1.61833	-6.58415	1.85271	8.5412	yes	8.89447	8.29626	8.78443	-1.51384	1.40267	yes
3102-5p.2-5p	94	101	164	8.58002	8.895	16.5732	1.03671	0.251581	1.8632	4.9997	no	6.48272	6.81387	7.33452	1.25802	1.4346	no
467c-5p	471	474	770	42.9914	41.7449	77.813	-1.02986	-0.452271	1.86402	10.8401	no	8.92106	8.95529	9.59193	1.02401	1.55471	no
673-5p	331	222	361	30.2126	19.5514	36.4812	-1.54529	-5.05659	1.86591	7.43242	yes	8.36411	7.83264	8.44597	-1.4454	1.52979	yes
337-5p	1772	1450	2362	161.742	127.701	238.694	-1.26658	-6.68946	1.86917	19.0575	yes	10.8641	10.5855	11.0667	-1.21303	1.39597	no
665-3p	7221	3640	5935	659.11	320.572	599.767	-2.05604	-36.2397	1.87093	30.2512	yes	12.9277	11.8456	12.5485	-2.11717	1.62788	yes
367-3p	19	19	31	1.73426	1.67332	3.13273	-1.03642	-0.110264	1.87217	2.18777	no	4.34419	4.21911	4.99144	-1.09057	1.70803	no
433-5p	192	117	191	17.5251	10.3041	19.3017	-1.70079	-4.58174	1.8732	5.4345	yes	7.56595	7.0115	7.60227	-1.46861	1.50606	yes
27b-3p	1265	1181	1938	115.465	104.01	195.846	-1.11014	-2.5835	1.88296	17.432	no	10.3315	10.2642	10.8337	-1.0478	1.48401	no
96-5p	1583	1389	2283	144.491	122.328	230.711	-1.18118	-4.53459	1.886	18.9606	no	10.6737	10.4767	11.0311	-1.14633	1.46853	no
329-5p	1581	689	1133	144.309	60.6798	114.496	-2.3782	-19.5782	1.88689	13.3649	yes	10.6539	9.53328	10.1095	-2.17438	1.49098	yes
5099	24	45	74	2.19064	3.96312	7.47814	1.80911	2.37993	1.88693	3.41556	no	4.58413	5.49185	6.20835	1.87609	1.64319	no
125a-5p	1111	1034	1702	101.409	91.0637	171.997	-1.1136	-2.49137	1.88876	16.4023	no	10.042	10.1095	10.6046	1.04794	1.40934	no
30b-3p	77	60	99	7.02831	5.28416	10.0045	-1.33007	-1.66201	1.89331	3.96813	no	6.1953	5.90689	6.60257	-1.22129	1.61965	no
154-3p	4173	1849	3065	380.898	162.84	309.736	-2.33909	-31.345	1.90209	22.2152	yes	11.99	10.9743	11.4421	-2.02178	1.38298	yes
3102-5p	50	50	83	4.56384	4.40347	8.38764	-1.03642	-0.178872	1.90478	3.66202	no	5.59953	5.65319	6.35661	1.03789	1.62836	no
1946a	11	3	5	1.00404	0.264208	0.50528	-3.80021	-2.20536	1.91243	0.903458	no	3.5222	1.58496	2.32193	-3.82971	1.66667	no
3092-3p	13	6	10	1.1866	0.528416	1.01056	-2.24558	-1.68414	1.91243	1.27768	no	3.8049	2.58496	3.32193	-2.32936	1.66667	no
135a-1-3p	6	3	5	0.547661	0.264208	0.50528	-2.07284	-1.05382	1.91243	0.903458	no	1	2.58496	2.65909	3	1.05273	no
190b-3p	13	9	15	1.1866	0.792624	1.51584	-1.49705	-0.936838	1.91243	1.56484	no	3.8049	3.69759	3.4136	-1.07722	-1.21756	no
486-3p	8	9	15	0.730214	0.792624	1.51584	1.08547	0.168824	1.91243	1.56484	no	2.93578	3.16993	3.8049	1.17621	1.55291	no
151-5p	823	994	1659	75.1208	87.5409	167.652	1.16533	3.24992	1.91512	16.4876	no	9.57564	9.98773	10.5855	1.33061	1.51333	no
412-5p	469	316	528	42.8088	27.8299	53.3575	-1.53823	-5.96294	1.91727	9.31439	yes	8.86611	8.37337	8.91524	-1.40711	1.45586	yes
20b-3p	118	86	144	10.7707	7.57396	14.552	-1.42206	-2.4963	1.92133	4.87733	yes	6.77602	6.49577	7.14868	-1.2144	1.57234	no
450b-5p	40	26	44	3.65107	2.2898	4.44646	-1.59449	-1.86888	1.94185	2.73237	no	5.29742	4.73608	5.45931	-1.47564	1.65087	no
466g	8	13	22	0.730214	1.1449	2.22323	1.5679	1.0093	1.94185	1.93208	no	2.93578	3.69759	4.39123	1.69561	1.61736	no
467e-5p	356	430	728	32.4945	37.8698	73.5687	1.16542	2.13847	1.94267	11.1204	no	8.44597	8.8463	9.43903	1.31981	1.50809	no
182-5p	9552	9215	15712	871.876	811.559	1587.79	-1.07432	-4.91286	1.95647	52.1456	no	13.2108	13.3603	13.8517	1.10918	1.40581	no
211-3p	9	18	31	0.821491	1.58525	3.13273	1.92972	1.63938	1.97618	2.34334	no	3.16993	4.11328	4.99144	1.923	1.83803	no
16-1-3p	451	375	649	41.1658	33.026	65.5853	-1.24647	-3.15894	1.98587	10.7855	no	8.80888	8.67993	9.25164	-1.0935	1.48628	no
1298-5p	7	4	7	0.638938	0.352277	0.707391	-1.81373	-0.964004	2.00805	1.13495	no	2.69616	2	2.87157	-1.62019	1.82965	no
1958	4	4	7	0.365107	0.352277	0.707391	-1.03642	-0.0505926	2.00805	1.13495	no	2.32193	2	2.65909	-1.25	1.57909	no
330-5p	8	8	14	0.730214	0.704555	1.41478	-1.03642	-0.0715488	2.00805	1.60507	no	2.93578	3	3.7154	1.04552	1.64194	no
3066-5p	92	56	99	8.39747	4.93188	10.0045	-1.70269	-3.17727	2.02854	4.31895	yes	6.43881	5.84096	6.60257	-1.51346	1.69538	yes
141-5p	16	13	23	1.46043	1.1449	2.32429	-1.27559	-0.653501	2.03012	2.08359	no	4.12628	3.69759	4.48081	-1.34602	1.72097	no
1197-3p	50	31	55	4.56384	2.73015	5.55807	-1.67165	-2.27244	2.03581	3.23241	yes	5.48105	5.54425	5.48645	1.04478	-1.04088	no
3099-3p	36	27	48	3.28596	2.37787	4.85068	-1.38189	-1.27605	2.03993	3.02669	no	5.11495	4.78112	5.59953	-1.26035	1.76346	no
200c-3p	1443	862	1545	131.712	75.9158	156.131	-1.73498	-12.9629	2.05664	17.3321	yes	10.5194	9.79084	10.5088	-1.65698	1.64486	yes
28c	12	10	18	1.09532	0.880693	1.81901	-1.2437	-0.510368	2.06543	1.87965	no	2.93578	3.90475	3.96494	1.95743	1.0426	no
615-3p	2	5	9	0.182554	0.440347	0.909503	2.41215	1.08675	2.06543	1.32911	no	2.93578	2.58496	1	-1.27529	-3	no
1193-3p	40	40	73	3.65107	3.52277	7.37708	-1.03642	-0.159988	2.09411	3.8434	no	5.29742	5.34539	6.1953	1.03381	1.80238	no
351-3p	57	46	84	5.20278	4.05119	8.4887	-1.28426	-1.26557	2.09536	4.12549	no	5.8072	5.54425	6.38872	-1.19993	1.79561	no
497-5p	763	435	796	69.6442	38.3102	80.4405	-1.8179	-10.0973	2.09972	12.7287	yes	9.48962	8.87281	9.62173	-1.53348	1.68053	yes
148b-3p	776	838	1553	70.8308	73.8021	156.94	1.04195	0.824929	2.1265	18.0235	no	9.50857	9.76833	10.5194	1.19728	1.68304	no
466k	12	7	13	1.09532	0.616485	1.31373	-1.77672	-1.22523	2.13099	1.65263	no	3.32193	3.16993	3.6201	-1.11111	1.36621	no
351-5p	67	52	97	6.11555	4.5796	9.80242	-1.33539	-1.5704	2.14045	4.53545	no	6.05864	5.69568	6.5574	-1.28606	1.81721	no
26b-5p	5104	5305	9916	465.877	467.208	1002.07	1.00286	0.145533	2.14481	45.9709	no	12.2901	12.3787	13.274	1.06333	1.86008	no
96-3p	31	46	86	2.82958	4.05119	8.69081	1.43173	1.55273	2.14525	4.28059	no	4.88948	5.54425	6.45258	1.57436	1.87688	no
758-3p	32	16	30	2.92086	1.40911	3.03168	-2.07284	-2.4337	2.15148	2.5359	yes	4.93793	3.90475	4.88948	-2.04653	1.97895	yes
1967	10	8	15	0.912768	0.704555	1.51584	-1.29552	-0.547369	2.15148	1.79315	no	3.32193	3	3.8049	-1.25	1.74702	no
667-5p	178	57	107	16.2473	5.01995	10.813	-3.23654	-8.16868	2.154	4.79504	yes	7.46485	5.88222	6.70112	-2.99515	1.76405	yes
1951	47	18	34	4.29001	1.58525	3.4359	-2.70621	-3.7418	2.16742	2.72039	yes	4.88948	5.28509	4.84111	1.31549	-1.36035	no
339-3p	34	18	34	3.10341	1.58525	3.4359	-1.95768	-2.34814	2.16742	2.72039	yes	4.99862	4.11328	5.0936	-1.84719	1.9729	yes
376a-5p	14	9	17	1.27788	0.792624	1.71795	-1.61221	-1.12852	2.16742	1.9236	no	3.96494	3.16993	4.02727	-1.73509	1.8117	no
187-5p	38	37	70	3.46852	3.25856	7.07391	-1.06443	-0.270397	2.17087	3.90976	no	5.24759	5.19628	6.11178	-1.03621	1.88623	no
1981-5p	3700	2352	4451	337.724	207.139	449.8	-1.63042	-18.7245	2.17149	31.1907	yes	11.7334	11.3804	12.079	-1.27728	1.62302	yes
669l-5p	90	93	177	8.21491	8.19045	17.8869	0.997022	-0.0201716	2.18387	6.25519	no	6.4137	6.66926	7.46622	1.1938	1.73744	no
296-5p	2720	1779	3387	248.273	156.675	342.276	-1.58463	-15.2327	2.18462	27.3755	yes	11.3683	10.8337	11.7959	-1.44861	1.94836	yes
668-5p	6	21	40	0.547661	1.84946	4.04224	3.37701	2.79427	2.18564	2.97603	no	2.49728	4.39123	5.34539	3.71649	1.93746	no
134-3p	16	11	21	1.46043	0.968763	2.12217	-1.50752	-1.05535	2.1906	2.16131	no	4.12628	3.45943	4.33119	-1.58761	1.82989	no
3095-3p	669	360	689	61.0642	31.705	69.6275	-1.92601	-10.2083	2.19611	12.4116	yes	9.32692	8.58652	9.36031	-1.67064	1.70976	yes
212-5p	26	18	35	2.3732	1.58525	3.53696	-1.49705	-1.32489	2.23117	2.84174	no	4.71722	4.11328	5.15601	-1.51985	2.06011	no
409-3p	3928	2332	4541	358.535	205.378	458.895	-1.74574	-21.5933	2.2344	32.4199	yes	11.8456	11.3683	12.1204	-1.39205	1.68414	yes
151-3p	1298	967	1890	118.477	85.163	190.996	-1.39118	-7.80774	2.24271	20.9894	yes	10.3904	9.94781	10.8153	-1.35907	1.82449	yes
218-5p	11	23	45	1.00404	2.02559	4.54752	2.01743	1.95401	2.24503	3.24179	no	3.5222	4.59356	5.48645	2.10141	1.85689	no
700-3p	197	198	388	17.9815	17.4377	39.2097	-1.03119	-0.30518	2.24856	9.5337	no	7.62424	7.60717	8.52921	-1.01191	1.8948	no
3474	60	28	55	5.47661	2.46594	5.55807	-2.2209	-3.57956	2.25394	3.59772	yes	5.41495	6.35041	4.48081	1.9125	-3.65431	no
17-3p	4537	2494	4925	414.123	219.645	497.7	-1.88542	-25.8725	2.26593	34.2248	yes	12.1204	11.4421	12.2708	-1.60017	1.77611	yes
302a-5p	458	237	471	41.8048	20.8724	47.5973	-2.00287	-8.85604	2.28039	10.6467	yes	8.82525	7.91081	8.73981	-1.88484	1.77646	yes
720	227	246	489	20.7198	21.6651	49.4163	1.04562	0.484745	2.28092	10.8506	no	7.80936	7.99146	8.80205	1.13453	1.75392	no
494-5p	42	13	26	3.83363	1.1449	2.62745	-3.34843	-4.04364	2.29492	2.51643	yes	5.34539	3.69759	4.62262	-3.13357	1.89873	yes
450a-1-3p	11	6	12	1.00404	0.528416	1.21267	-1.9001	-1.28662	2.29492	1.70958	no	3.5222	2.58496	3.50128	-1.91485	1.88729	no
3078-5p	8	5	10	0.730214	0.440347	1.01056	-1.65827	-0.896677	2.29492	1.56062	no	2.93578	2.32193	3.32193	-1.53034	2	no
212-3p	9	8	16	0.821491	0.704555	1.61689	-1.16597	-0.316325	2.29492	1.97405	no	3.16993	3	3.96494	-1.125	1.95198	no
671-3p	2	8	16	0.182554	0.704555	1.61689	3.85944	1.84111	2.29492	1.97405	no	1	3	3.96494	4	1.95198	no
335-3p	138	112	225	12.5962	9.86376	22.7376	-1.27702	-1.92748	2.30516	7.43366	no	7.02314	6.95433	7.80071	-1.04886	1.798	no
106b-3p	1671	1557	3131	152.524	137.124	316.406	-1.1123	-3.0233	2.30745	27.7586	no	10.7589	10.6906	11.5149	-1.04847	1.7707	no
666-5p	103	91	184	9.40151	8.01431	18.5943	-1.17309	-1.11083	2.32014	6.76282	no	6.60257	6.61713	7.53134	1.01014	1.88453	no
9-3p	149	87	177	13.6002	7.66203	17.8869	-1.77502	-4.31131	2.33448	6.6706	yes	7.09699	6.55242	7.46622	-1.45858	1.884	yes
9-5p	432	318	647	39.4316	28.006	65.3832	-1.40797	-4.6533	2.33461	12.7544	yes	8.73455	8.42272	9.20893	-1.24127	1.72453	no
370-3p	177	93	191	16.156	8.19045	19.3017	-1.97254	-5.40684	2.35661	6.98896	yes	7.41403	6.66926	7.60227	-1.6757	1.90925	yes
1945	26	14	29	2.3732	1.23297	2.93062	-1.92478	-2.0108	2.37688	2.74424	yes	4.71722	3.8049	4.84111	-1.88207	2.05083	yes
148b-5p	85	65	137	7.75853	5.72451	13.8447	-1.35532	-1.85233	2.41849	6.05616	no	6.35041	6.05864	7.04474	-1.22414	1.98082	no
1947-5p	119	92	194	10.8619	8.10238	19.6048	-1.34059	-2.11889	2.41964	7.20971	yes	6.78917	6.64316	7.65038	-1.1065	2.01003	no
540-3p	829	566	1197	75.6685	49.8472	120.964	-1.51801	-7.711	2.42669	17.9544	yes	9.60683	9.18729	10.2112	-1.33751	2.03346	yes
192-5p	3090	3301	7048	282.045	290.717	712.242	1.03075	1.20998	2.44995	43.9326	no	11.5682	11.757	12.8439	1.13984	2.12414	no
381-5p	52	31	67	4.74639	2.73015	6.77075	-1.73851	-2.46838	2.47999	4.32654	yes	5.677	4.99862	6.03677	-1.60035	2.05359	yes
7b-5p	63	62	134	5.75044	5.4603	13.5415	-1.05314	-0.289443	2.47999	6.11866	no	5.96959	5.97337	7.0115	1.00263	2.05355	no
503-3p	10	6	13	0.912768	0.528416	1.31373	-1.72737	-1.07171	2.48616	1.90973	no	3.32193	2.58496	3.6201	-1.66667	2.04931	no
32-3p	99	87	190	9.0364	7.66203	19.2006	-1.17937	-1.12398	2.50594	7.3489	no	6.5574	6.55242	7.56595	-1.00346	2.01884	no
141-3p	61	39	86	5.56789	3.4347	8.69081	-1.62107	-2.37923	2.53029	4.9833	yes	5.93458	5.28509	6.45258	-1.56862	2.24621	yes
377-5p	178	74	164	16.2473	6.51713	16.5732	-2.49301	-6.83642	2.54302	6.90952	yes	7.46485	6.31689	7.33452	-2.216	2.02458	yes
668-3p	143	108	240	13.0526	9.51149	24.2534	-1.3723	-2.49293	2.54991	8.37674	yes	7.06985	6.90878	7.89871	-1.11812	1.98609	no
1960	12	18	40	1.09532	1.58525	4.04224	1.44729	0.997649	2.54991	3.41977	no	3.69759	4.11328	5.34539	1.33394	2.3491	no
1198-5p	101	93	208	9.21896	8.19045	21.0196	-1.12557	-0.823602	2.56636	7.83837	no	6.58777	6.66926	7.70261	1.05811	2.04677	no
27b-5p	284	141	319	25.9226	12.4178	32.2368	-2.08754	-7.30645	2.59602	9.79525	yes	8.1843	7.26409	8.25352	-1.89238	1.98539	yes
5113	68	34	77	6.20682	2.99436	7.7813	-2.07284	-3.5477	2.59866	4.81621	yes	6.07279	5.11495	6.27139	-1.94239	2.22906	yes
541-3p	99	84	191	9.0364	7.39782	19.3017	-1.22149	-1.35099	2.6091	7.60906	no	6.5574	6.45258	7.60227	-1.07536	2.21866	no
30c-1-3p	56	54	123	5.1115	4.75574	12.4299	-1.07481	-0.378326	2.61366	6.11436	no	5.7812	5.7812	6.87951	1	2.14104	no
292-5p	17418	15270	35161	1589.86	1344.82	3553.23	-1.18221	-15.1276	2.64216	104.365	no	14.2273	14.0271	15.1176	-1.1489	2.12953	no
195-5p	70	56	129	6.38938	4.93188	13.0362	-1.29552	-1.44821	2.64325	6.31597	no	6.11178	5.84096	6.94597	-1.20649	2.151	no
1193-5p	260	180	417	23.732	15.8525	42.1403	-1.49705	-4.18971	2.65828	11.4046	yes	8.04789	7.50508	8.61946	-1.4568	2.16502	yes
344-3p	7	12	28	0.638938	1.05683	2.82957	1.65405	1.06929	2.6774	2.97112	no	3.32193	4.21911	4.11328	1.86242	-1.07611	no
1843-3p	12	5	12	1.09532	0.440347	1.21267	-2.48741	-1.77177	2.7539	1.98556	no	3.69759	2.32193	3.50128	-2.59486	2.26474	no
19a-5p	20	10	24	1.82554	0.880693	2.42534	-2.07284	-1.92401	2.7539	2.808	no	4.39123	3.32193	4.52265	-2.09841	2.29855	no
1247-3p	7	5	12	0.638938	0.440347	1.21267	-1.45099	-0.639406	2.7539	1.98556	no	2.69616	2.32193	3.50128	-1.29615	2.26474	no
204-3p	6	5	12	0.547661	0.440347	1.21267	-1.2437	-0.360885	2.7539	1.98556	no	2.49728	2.32193	3.50128	-1.12924	2.26474	no
18a-3p	55	50	120	5.02022	4.40347	12.1267	-1.14006	-0.671319	2.7539	6.2789	no	5.74573	5.65319	6.8453	-1.06625	2.28487	no
200b-3p	962	702	1721	87.8083	61.8247	173.917	-1.42028	-7.10472	2.81307	24.1397	yes	9.81539	9.57564	10.6279	-1.18079	2.07384	no
3068-3p	37	53	131	3.37724	4.66767	13.2383	1.3821	1.51713	2.83617	6.69751	no	5.19628	5.74573	6.96963	1.46353	2.33576	no
466i-5p	6	4	10	0.547661	0.352277	1.01056	-1.55463	-0.689121	2.86865	1.8649	no	3.32193	2.58496	2	-1.66667	-1.5	no
3470a	13	14	36	1.1866	1.23297	3.63801	1.03908	0.0995364	2.95061	3.60533	no	4.58413	3.90475	4.48081	-1.60145	1.49077	no
758-5p	178	54	140	16.2473	4.75574	14.1478	-3.41635	-8.41479	2.97489	7.14776	yes	7.46485	5.7812	7.09699	-3.2124	2.48938	yes
1954	8	11	29	0.730214	0.968763	2.93062	1.32668	0.610389	3.02512	3.2881	no	2.93578	3.45943	4.84111	1.43758	2.60571	no
505-5p	243	105	277	22.1803	9.24728	27.9925	-2.39857	-7.7325	3.02711	10.1664	yes	7.91081	6.88181	8.02265	-2.0406	2.20508	yes
193b-5p	57	31	82	5.20278	2.73015	8.28658	-1.90568	-2.93986	3.03521	5.5407	yes	5.8072	4.99862	6.31977	-1.75149	2.49866	yes
185-3p	132	60	159	12.0485	5.28416	16.0679	-2.28012	-5.44486	3.04077	7.72424	yes	6.95433	5.90689	7.26409	-2.06685	2.56188	yes
184-3p	553	490	1302	50.4761	43.154	131.575	-1.16967	-2.52878	3.04896	22.1417	no	9.18729	9.00615	10.3315	-1.13378	2.50601	no
200a-3p	4272	2638	7019	389.935	232.327	709.311	-1.67839	-21.1501	3.05308	51.4622	yes	12.0263	11.4737	12.8307	-1.46674	2.5615	yes
99b-3p	201	216	575	18.3466	19.023	58.1071	1.03686	0.369407	3.05458	14.7308	no	7.66721	7.77134	9.07991	1.07484	2.47698	no
291b-5p	192	128	342	17.5251	11.2729	34.5611	-1.55463	-3.89828	3.06587	11.3867	yes	7.56595	7.13856	8.36411	-1.3448	2.33844	yes
374-3p	51	31	83	4.65512	2.73015	8.38764	-1.70508	-2.37096	3.07223	5.61668	yes	5.63881	4.99862	6.35661	-1.55853	2.56328	yes
741-5p	15	4	11	1.36915	0.352277	1.11161	-3.88657	-2.60195	3.15551	2.07824	yes	4.05476	2	3.4136	-4.15474	2.66401	yes
3470b	10	4	11	0.912768	0.352277	1.11161	-2.59105	-1.67075	3.15551	2.07824	no	2.49728	3	3.4136	1.41688	1.332	no
483-5p	189	212	585	17.2513	18.6707	59.1177	1.08228	0.790565	3.16634	15.187	no	7.54167	7.70261	9.11685	1.11802	2.66519	no
449c-5p	161	48	134	14.6956	4.22733	13.5415	-3.47633	-8.07625	3.20332	7.31841	yes	7.24375	5.60459	7.0115	-3.11485	2.65167	yes
3057-3p	13	5	14	1.1866	0.440347	1.41478	-2.69469	-1.96181	3.21288	2.36965	yes	3.32193	4.21911	1.58496	1.86242	-6.20806	no
335-5p	608	631	1774	55.4963	55.5717	179.273	1.00136	0.0239061	3.22598	26.7392	no	9.25427	9.43903	10.6737	1.13663	2.3533	no
130b-5p	177	122	343	16.156	10.7445	34.6622	-1.50366	-3.49056	3.22605	11.7572	yes	7.41403	7.06985	8.38264	-1.26943	2.48421	yes
139-3p	53	22	62	4.83767	1.93753	6.26547	-2.49683	-3.73506	3.23375	5.00552	yes	5.70026	4.50219	5.93856	-2.29434	2.70639	yes
1929-5p	35	12	34	3.19469	1.05683	3.4359	-3.02289	-3.47806	3.25113	3.71822	yes	5.04309	3.54312	5.0936	-2.82838	2.92915	yes
1191	11	6	17	1.00404	0.528416	1.71795	-1.9001	-1.28662	3.25113	2.62918	no	3.5222	4.21911	2	1.62103	-4.65605	no
1943-5p	105	79	226	9.58406	6.95748	22.8386	-1.37752	-2.15969	3.2826	9.63923	yes	6.61713	6.37402	7.80936	-1.18354	2.70446	no
493-5p	51	63	181	4.65512	5.54837	18.2911	1.19189	0.933102	3.29667	8.64724	no	5.63881	5.99988	7.50508	1.28438	2.83863	no
330-3p	702	330	956	64.0763	29.0629	96.6094	-2.20475	-12.1566	3.32415	19.9665	yes	9.40052	8.45268	9.9155	-1.92899	2.75648	yes
708-5p	2830	1817	5274	258.313	160.022	532.969	-1.61424	-16.0835	3.3306	46.954	yes	11.4737	10.8641	12.4103	-1.52583	2.92046	yes
296-3p	894	523	1524	81.6015	46.0603	154.009	-1.77162	-10.531	3.34365	25.2922	yes	9.72071	9.07991	10.4499	-1.55919	2.58461	yes
5128	103	71	207	9.40151	6.25292	20.9186	-1.50354	-2.66226	3.34541	9.32371	yes	6.60257	6.21487	7.69802	-1.30831	2.79559	yes
219-1-3p	446	257	769	40.7095	22.6338	77.712	-1.79861	-7.60379	3.43345	18.2273	yes	8.79521	8.08012	9.57564	-1.64159	2.81966	yes
92b-3p	2127	1708	5121	194.146	150.422	517.507	-1.29067	-7.87546	3.44036	47.0939	yes	11.1548	10.7831	12.3473	-1.29387	2.95715	yes
1946b	5	2	6	0.456384	0.176139	0.606335	-2.59105	-1.1814	3.44238	1.61224	no	2.32193	1	2.65909	-2.5	3.15818	no
1199-5p	7	5	15	0.638938	0.440347	1.51584	-1.45099	-0.639406	3.44238	2.54917	no	2.69616	2.32193	3.8049	-1.29615	2.79523	no
3066-3p	3	3	9	0.27383	0.264208	0.909503	-1.03642	-0.0438145	3.44238	1.97458	no	2	2	2.87157	1	1.82965	no
149-3p	40	32	98	3.65107	2.81822	9.90348	-1.29552	-1.09474	3.51409	6.58707	no	5.29742	5.05767	6.57568	-1.18079	2.86396	no
323-5p	527	248	766	48.1029	21.8412	77.4088	-2.20239	-10.5217	3.54417	18.4978	yes	9.07991	8.02265	9.55722	-2.08099	2.89702	yes
92a-1-5p	3216	1746	5490	293.546	153.769	554.797	-1.90901	-22.1342	3.60799	49.9811	yes	11.6181	10.7973	12.462	-1.76643	3.17065	yes
375-3p	287	60	195	26.1964	5.28416	19.7059	-4.95754	-12.5212	3.72924	9.5732	yes	8.20104	5.90689	7.65754	-4.90464	3.36511	yes
27a-5p	46	52	176	4.19873	4.5796	17.7858	1.09071	0.429115	3.88371	9.27088	no	5.52356	5.69568	7.45381	1.12671	3.38259	no
129-5p	92	39	133	8.39747	3.4347	13.4404	-2.44489	-4.83611	3.91313	8.08711	yes	6.43881	5.28509	6.98715	-2.22487	3.25367	yes
129-2-3p	309	185	633	28.2045	16.2928	63.9684	-1.7311	-5.97754	3.92617	17.6699	yes	8.30237	7.54934	9.18729	-1.68533	3.11222	yes
1934-5p	9	8	28	0.821491	0.704555	2.82957	-1.16597	-0.316325	4.01611	3.7542	no	3.16993	3	4.75423	-1.125	3.37346	no
132-5p	18	11	40	1.64298	0.968763	4.04224	-1.69596	-1.3964	4.17258	4.56196	no	4.28299	3.45943	5.34539	-1.76977	3.69599	no
200b-5p	128	85	314	11.6834	7.48589	31.7316	-1.56073	-3.20785	4.23885	12.8664	yes	6.90878	6.4799	8.18601	-1.34618	3.26279	yes
1930-5p	23	10	37	2.09937	0.880693	3.73907	-2.38377	-2.36613	4.2456	4.41955	yes	4.50219	3.32193	5.25384	-2.26617	3.81561	yes
1188-5p	74	28	104	6.75448	2.46594	10.5098	-2.73911	-4.73607	4.26199	7.42141	yes	6.15561	4.85741	6.67146	-2.45923	3.51628	yes
302b-5p	11	4	15	1.00404	0.352277	1.51584	-2.85015	-1.87696	4.30297	2.82956	no	3.5222	2	3.8049	-2.87228	3.49404	no
5122	66	14	53	6.02427	1.23297	5.35596	-4.88598	-5.97471	4.34395	5.33928	yes	6.03677	3.8049	5.74573	-4.69744	3.83929	yes
203-3p	111	55	215	10.1317	4.84381	21.727	-2.09168	-4.57762	4.48552	10.8914	yes	6.69682	5.81571	7.75926	-1.84179	3.8465	yes
181c-3p	485	297	1212	44.2692	26.1566	122.48	-1.69247	-7.22427	4.68256	26.285	yes	8.95529	8.25352	10.2319	-1.6265	3.94052	yes
760-3p	94	32	134	8.58002	2.81822	13.5415	-3.04448	-5.72508	4.80498	8.8223	yes	6.48272	5.05767	7.0115	-2.68523	3.874	yes
5111-5p	12	5	21	1.09532	0.440347	2.12217	-2.48741	-1.77177	4.81933	3.49624	no	3.69759	2.32193	4.33119	-2.59486	4.02575	no
1957	10	5	21	0.912768	0.440347	2.12217	-2.07284	-1.36048	4.81933	3.49624	no	3.32193	2.32193	4.33119	-2	4.02575	no
135b-3p	14	17	72	1.27788	1.49718	7.27603	1.17162	0.439311	4.85982	6.49313	no	3.96494	3.99409	6.16554	1.02041	4.50474	no
92b-5p	986	613	2611	89.9989	53.9865	263.857	-1.66706	-10.045	4.88746	39.1826	yes	9.85534	9.38657	11.1762	-1.38392	3.45727	yes
3473	236	84	369	21.5413	7.39782	37.2896	-2.91185	-8.81846	5.04062	14.8873	yes	7.8513	6.45258	8.47115	-2.63668	4.05181	yes
669n	3	2	9	0.27383	0.176139	0.909503	-1.55463	-0.487282	5.16356	2.34385	no	2.49728	2.80735	0	1.23977	-7	no
1927	20	6	28	1.82554	0.528416	2.82957	-3.45473	-2.83727	5.35481	4.18324	yes	4.39123	2.58496	4.75423	-3.49735	4.49794	yes
877-5p	1254	606	3023	114.461	53.37	305.492	-2.14467	-15.7996	5.72404	44.3671	yes	10.3207	9.36031	11.4117	-1.94578	4.14512	yes
128-1-5p	8	2	10	0.730214	0.176139	1.01056	-4.14568	-1.95423	5.73729	2.5533	no	2.93578	1	3.32193	-3.82586	5	no
504-5p	23	17	85	2.09937	1.49718	8.58975	-1.40222	-1.06196	5.73729	7.44409	no	4.50219	3.99409	6.42485	-1.42217	5.39175	no
1941-5p	2	2	10	0.182554	0.176139	1.01056	-1.03642	-0.0357744	5.73729	2.5533	no	2.93578	1.58496	1.58496	-2.55057	1	no
23b-5p	861	210	1140	78.5893	18.4946	115.204	-4.24932	-20.4814	6.22906	27.9011	yes	9.6647	7.66721	10.1258	-3.99305	5.49692	yes
142-5p	49	34	219	4.47256	2.99436	22.1312	-1.49366	-1.80969	7.39098	12.7532	no	5.56946	5.11495	7.77901	-1.37032	6.33814	no
150-3p	82	81	555	7.4847	7.13361	56.086	-1.04922	-0.306708	7.86222	20.5759	no	6.25873	6.3917	9.03877	1.09655	6.26394	no
429-5p	5	2	14	0.456384	0.176139	1.41478	-2.59105	-1.1814	8.03221	3.28242	no	2.32193	1	3.7154	-2.5	6.56778	no
182-3p	279	283	2011	25.4662	24.9236	203.223	-1.02177	-0.25529	8.15385	39.4625	no	8.17072	8.22406	10.8641	1.03766	6.23337	no
92a-2-5p	4231	915	6704	386.192	80.5834	677.479	-4.79245	-47.5213	8.40717	72.4993	yes	12.0054	9.90742	12.7328	-4.28108	7.08785	yes
708-3p	727	300	2199	66.3582	26.4208	222.222	-2.51159	-13.8999	8.41087	41.5207	yes	9.42315	8.27798	10.9476	-2.21173	6.36257	yes
195-3p	9	8	60	0.821491	0.704555	6.06335	-1.16597	-0.316325	8.60594	6.88844	no	3.16993	3	5.90285	-1.125	7.47902	no
23a-5p	266	180	1857	24.2796	15.8525	187.661	-1.5316	-4.45067	11.8379	40.353	yes	8.10028	7.50508	10.7831	-1.51069	9.70008	yes
181d-3p	49	22	247	4.47256	1.93753	24.9608	-2.30839	-3.35555	12.8828	14.8799	yes	5.56946	4.50219	7.92857	-2.09547	10.7509	yes
5130	2	1	18	0.182554	0.0880693	1.81901	-2.07284	-0.608424	20.6543	4.20932	no	1	0	4.11328	-2	17.307	no
497-3p	10	2	51	0.912768	0.176139	5.15385	-5.1821	-2.37173	29.2602	7.24768	yes	4.50219	4.27126	4.21911	-1.17359	-1.03681	no
	miRNAs displaying a significant p-Smad2/3 activation profile and a high abundance, also shown in Table 1
