# Supplementary material for: TGF-β/Smad2/3 Signaling Directly Regulates Several miRNAs in Mouse ES Cells and Early Embryos
Source: PLoS One. 2013 Jan 30;8(1):e55186. doi: 10.1371/journal.pone.0055186 (PMC3559380; doi:10.1371/journal.pone.0055186)
Supplement: Table S2 — Response of the miRNAs of the putative pri-miR-341∼3072 cluster to changes in the p-Smad2/3 activation profile as detected by short RNA deep-sequencing. ND = Not Detected. (XLSX) [file pone.0055186.s002.xlsx]

## Sheet: Table S2
Table S2. Response of the miRNAs of the putative pri-miR-341~3072 cluster to changes in the p-Smad2/3 activation profile as detected by short RNA deep-sequencing
miRNA	Raw reads			Normalized reads			Fold change comparisons and Z-scores				Significant p-Smad2/3 activation profile	Qnorm (log2 scale)
	0 h	16 h	16+12 h	0 h	16 h	16+12 h	16h vs 0h		16+12h vs. 16h			0 h	16 h	16+12 h	16h v 0h	16+12h vs. 16h	Significant p-Smad2/3 activation profile
							Fold change	Z-score	Fold change	Z-score
1188-5p	74	28	104	6.75448	2.46594	10.5098	-2.73911	-4.73607	4.26199	7.42141	yes	6.15561	4.85741	6.67146	-2.45923	3.51628	yes
1193-5p	260	180	417	23.732	15.8525	42.1403	-1.49705	-4.18971	2.65828	11.4046	yes	8.04789	7.50508	8.61946	-1.4568	2.16502	yes
1197-3p	50	31	55	4.56384	2.73015	5.55807	-1.67165	-2.27244	2.03581	3.23241	yes	5.48105	5.54425	5.48645	1.04478	-1.04088	no
154-3p	4173	1849	3065	380.898	162.84	309.736	-2.33909	-31.345	1.90209	22.2152	yes	11.99	10.9743	11.4421	-2.02178	1.38298	yes
299-3p	665	384	479	60.6991	33.8186	48.4058	-1.79484	-9.25692	1.43134	5.26358	yes	9.31909	8.73981	8.75635	-1.4941	1.01153	no
300-3p	915	615	757	83.5183	54.1626	76.4993	-1.54199	-8.37082	1.4124	6.39238	yes	9.76833	9.40052	9.53328	-1.29039	1.09639	no
323-3p	12677	6410	12510	1157.12	564.524	1264.21	-2.04972	-47.8608	2.23942	53.9439	yes	13.5483	12.6272	13.6112	-1.89347	1.9779	yes
323-5p	527	248	766	48.1029	21.8412	77.4088	-2.20239	-10.5217	3.54417	18.4978	yes	9.07991	8.02265	9.55722	-2.08099	2.89702	yes
329-5p	1581	689	1133	144.309	60.6798	114.496	-2.3782	-19.5782	1.88689	13.3649	yes	10.6539	9.53328	10.1095	-2.17438	1.49098	yes
341-3p	14130	9000	11191	1289.74	792.624	1130.92	-1.62718	-36.4757	1.4268	25.248	yes	13.7626	13.2108	13.4412	-1.46581	1.17311	no
369-3p	1026	811	936	93.65	71.4242	94.5883	-1.31118	-5.78399	1.32432	5.87481	yes	9.91946	9.73832	9.87462	-1.13378	1.09908	no
369-5p	534	409	528	48.7418	36.0204	53.3575	-1.35317	-4.62059	1.48132	6.00378	yes	9.14352	8.80888	8.91524	-1.26107	1.07651	no
370-3p	177	93	191	16.156	8.19045	19.3017	-1.97254	-5.40684	2.35661	6.98896	yes	7.41403	6.66926	7.60227	-1.6757	1.90925	yes
376b-3p	5108	3906	5067	466.242	343.999	512.05	-1.35536	-14.3635	1.48852	18.8093	yes	12.2994	11.9528	12.2901	-1.27162	1.26338	yes
377-3p	155	97	117	14.1479	8.54272	11.8235	-1.65614	-3.93821	1.38405	2.3773	yes	7.16646	6.77602	6.81182	-1.31079	1.02513	no
377-5p	178	74	164	16.2473	6.51713	16.5732	-2.49301	-6.83642	2.54302	6.90952	yes	7.46485	6.31689	7.33452	-2.216	2.02458	yes
380-5p	113	79	121	10.3143	6.95748	12.2278	-1.48247	-2.70199	1.7575	3.95028	yes	6.71019	6.37402	6.86088	-1.2624	1.40139	yes
381-3p	231	133	161	21.0849	11.7132	16.27	-1.8001	-5.47873	1.38903	2.81705	yes	7.83264	7.2056	7.29772	-1.54439	1.06593	no
381-5p	52	31	67	4.74639	2.73015	6.77075	-1.73851	-2.46838	2.47999	4.32654	yes	5.677	4.99862	6.03677	-1.60035	2.05359	yes
382-3p	12866	7865	9310	1174.37	692.665	940.83	-1.69543	-37.3317	1.35828	20.0805	yes	13.6112	12.8439	13.1686	-1.70204	1.25236	yes
382-5p	21060	11862	19882	1922.29	1044.68	2009.19	-1.84008	-53.9868	1.92327	57.4262	yes	14.4531	13.5698	14.0517	-1.84453	1.39655	yes
409-3p	3928	2332	4541	358.535	205.378	458.895	-1.74574	-21.5933	2.2344	32.4199	yes	11.8456	11.3683	12.1204	-1.39205	1.68414	yes
409-5p	780	572	750	71.1959	50.3757	75.7919	-1.4133	-6.31565	1.50453	7.40997	yes	9.53328	9.20893	9.50857	-1.2521	1.23084	no
412-5p	469	316	528	42.8088	27.8299	53.3575	-1.53823	-5.96294	1.91727	9.31439	yes	8.86611	8.37337	8.91524	-1.40711	1.45586	yes
485-3p	15123	3204	14883	1380.38	282.174	1504.02	-4.89194	-90.5156	5.3301	96.3437	yes	13.8517	11.7334	13.7985	-4.34189	4.18464	yes
485-5p	11901	5602	9914	1086.29	493.364	1001.87	-2.20179	-50.0056	2.03069	43.2882	yes	13.3858	12.4336	13.2108	-1.93484	1.71383	yes
494-3p	4107	1411	1849	374.874	124.266	186.852	-3.01671	-37.6327	1.50365	11.6202	yes	11.9528	10.5194	10.7589	-2.70076	1.18058	no
494-5p	42	13	26	3.83363	1.1449	2.62745	-3.34843	-4.04364	2.29492	2.51643	yes	5.34539	3.69759	4.62262	-3.13357	1.89873	yes
541-5p	28812	19793	30572	2629.87	1743.16	3089.48	-1.50868	-44.9079	1.77235	63.666	yes	14.833	14.4531	14.833	-1.30127	1.30127	yes
543-3p	77103	24436	50833	7037.72	2152.06	5136.97	-3.27022	-171.397	2.387	115.532	yes	16.1911	14.7485	15.5655	-2.71808	1.76172	yes
667-5p	178	57	107	16.2473	5.01995	10.813	-3.23654	-8.16868	2.154	4.79504	yes	7.46485	5.88222	6.70112	-2.99515	1.76405	yes
668-3p	143	108	240	13.0526	9.51149	24.2534	-1.3723	-2.49293	2.54991	8.37674	yes	7.06985	6.90878	7.89871	-1.11812	1.98609	no
758-3p	32	16	30	2.92086	1.40911	3.03168	-2.07284	-2.4337	2.15148	2.5359	yes	4.93793	3.90475	4.88948	-2.04653	1.97895	yes
758-5p	178	54	140	16.2473	4.75574	14.1478	-3.41635	-8.41479	2.97489	7.14776	yes	7.46485	5.7812	7.09699	-3.2124	2.48938	yes
1193-3p	40	40	73	3.65107	3.52277	7.37708	-1.03642	-0.159988	2.09411	3.8434	no	5.29742	5.34539	6.1953	1.03381	1.80238	no
134-3p	16	11	21	1.46043	0.968763	2.12217	-1.50752	-1.05535	2.1906	2.16131	no	4.12628	3.45943	4.33119	-1.58761	1.82989	no
134-5p	6934	5206	2600	632.913	458.489	262.745	-1.38043	-17.6613	-1.74499	-23.4887	no	12.7616	12.3473	11.1548	-1.33271	-2.2855	no
154-5p	1003	792	687	91.5506	69.7509	69.4254	-1.31254	-5.7391	0.995333	-0.0897188	no	9.88522	9.71041	9.34298	-1.12882	-1.29006	no
299-5p	509	335	172	46.4599	29.5032	17.3816	-1.57474	-6.51006	-1.69738	-5.70648	no	9.00521	8.49136	7.38689	-1.42786	-2.1502	no
300-5p	9	5	4	0.821491	0.440347	0.404224	-1.86556	-1.13614	-1.08936	-0.127635	no	3.16993	2.32193	2	-1.8	-1.25	no
3072-3p	77	19	21	7.02831	1.67332	2.12217	-4.20023	-6.09582	1.26824	0.75229	no	6.1953	4.21911	4.33119	-3.93453	1.08079	no
3072-5p	61	35	28	5.56789	3.08243	2.82957	-1.80633	-2.8293	-1.08936	-0.337691	no	5.93458	5.14942	4.75423	-1.72329	-1.31512	no
329-3p	5941	3549	2184	542.275	312.558	220.706	-1.73496	-26.3064	-1.41617	-12.8606	no	12.5485	11.7959	10.9415	-1.68484	-1.80804	no
341-5p	30	21	30	2.7383	1.84946	3.03168	-1.4806	-1.3882	1.63923	1.75477	no	4.86556	4.39123	4.88948	-1.38928	1.4125	no
370-5p	93	69	62	8.48874	6.07678	6.26547	-1.39691	-2.11359	1.03105	0.174745	no	6.45258	6.1786	5.93856	-1.20914	-1.18103	no
376a-3p	20472	12317	10780	1868.62	1084.75	1089.38	-1.72263	-48.3177	1.00427	0.323304	no	14.4122	13.6556	13.3858	-1.68949	-1.20563	no
376a-5p	14	9	17	1.27788	0.792624	1.71795	-1.61221	-1.12852	2.16742	1.9236	no	3.96494	3.16993	4.02727	-1.73509	1.8117	no
376b-5p	28	35	36	2.55575	3.08243	3.63801	1.20607	0.740084	1.18024	0.698924	no	5.44285	4.78112	4.75423	-1.58198	-1.01882	no
376c-3p	905	575	544	82.6055	50.6399	54.9744	-1.63123	-9.26775	1.0856	1.37356	no	9.73832	9.2569	9.00615	-1.39612	-1.18982	no
379-3p	185	184	100	16.8862	16.2048	10.1056	-1.04205	-0.395671	-1.60354	-3.83637	no	7.50769	7.53134	6.64077	1.01653	-1.85391	no
379-5p	5810	5551	5980	530.318	488.873	604.314	-1.08478	-4.33797	1.23614	11.3986	no	12.462	12.4103	12.5654	-1.03653	1.11356	no
380-3p	930	690	715	84.8874	60.7678	72.255	-1.39691	-6.68399	1.18903	3.24859	no	9.79084	9.55722	9.40052	-1.17578	-1.11473	no
410-3p	734	577	491	66.9972	50.816	49.6184	-1.31843	-4.98458	-1.02414	-0.388441	no	9.46398	9.27685	8.82525	-1.13849	-1.36756	no
410-5p	52	39	43	4.74639	3.4347	4.3454	-1.38189	-1.53362	1.26515	1.06605	no	5.677	5.28509	5.41495	-1.31213	1.09419	no
411-3p	809	741	532	73.8429	65.2594	53.7617	-1.13153	-2.43178	-1.21386	-3.41597	no	9.55722	9.62173	8.95529	1.04573	-1.58715	no
411-5p	2800	3002	3501	255.575	264.384	353.797	1.03447	1.29004	1.33819	11.7548	no	11.4117	11.6181	11.8572	1.15378	1.18025	no
412-3p	23	20	20	2.09937	1.76139	2.02112	-1.19188	-0.574864	1.14746	0.435314	no	3.69759	4.59356	4.75423	1.86086	1.11781	no
487b-3p	1737	1415	736	158.548	124.618	74.3771	-1.27227	-6.74102	-1.67549	-11.4833	no	10.7973	10.5478	9.46398	-1.18879	-2.11958	no
487b-5p	7	4	5	0.638938	0.352277	0.50528	-1.81373	-0.964004	1.43432	0.540609	no	2.49728	3	1	1.41688	-4	no
495-3p	9321	5631	5175	850.791	495.918	522.964	-1.71559	-32.3799	1.05454	2.75859	no	13.1686	12.462	12.3787	-1.6319	-1.05949	no
495-5p	37	39	15	3.37724	3.4347	1.51584	1.01701	0.0735157	-2.26588	-2.76793	no	5.19628	5.28509	3.8049	1.06349	-2.78986	no
496-3p	250	240	116	22.8192	21.1366	11.7225	-1.0796	-0.847785	-1.80309	-5.28892	no	7.99146	7.93843	6.78917	-1.03745	-2.218	no
496-5p	13	7	4	1.1866	0.616485	0.404224	-1.92478	-1.42185	-1.52511	-0.678394	no	3.8049	2.80735	2	-1.99659	-1.75	no
539-3p	24	11	10	2.19064	0.968763	1.01056	-2.26128	-2.30358	1.04314	0.0966802	no	4.58413	3.45943	3.32193	-2.18055	-1.1	no
539-5p	155	113	58	14.1479	9.95183	5.86124	-1.42164	-2.85881	-1.69791	-3.31586	no	7.16646	6.96963	5.85741	-1.14618	-2.16178	no
541-3p	99	84	191	9.0364	7.39782	19.3017	-1.22149	-1.35099	2.6091	7.60906	no	6.5574	6.45258	7.60227	-1.07536	2.21866	no
543-5p	64	42	38	5.84172	3.69891	3.84012	-1.57931	-2.32134	1.03818	0.167354	no	5.98101	5.41495	5.28509	-1.48047	-1.09419	no
666-3p	17	13	7	1.55171	1.1449	0.707391	-1.35532	-0.828386	-1.61848	-1.037	no	3.8049	3.16993	3.8049	-1.55291	1.55291	no
666-5p	103	91	184	9.40151	8.01431	18.5943	-1.17309	-1.11083	2.32014	6.76282	no	6.60257	6.61713	7.53134	1.01014	1.88453	no
667-3p	256	84	72	23.3669	7.39782	7.27603	-3.15861	-9.6594	-1.01674	-0.103368	no	8.02265	6.45258	6.16554	-2.96918	-1.22014	no
668-5p	6	21	40	0.547661	1.84946	4.04224	3.37701	2.79427	2.18564	2.97603	no	2.49728	4.39123	5.34539	3.71649	1.93746	no
679-5p	9	8	7	0.821491	0.704555	0.707391	-1.16597	-0.316325	1.00403	0.00776398	no	3.16993	3	2.87157	-1.125	-1.0931	no
1188-3p	ND	ND	ND
1197-5p	ND	ND	ND
299b-3p	ND	ND	ND
299b-5p	ND	ND	ND
376c-5p	ND	ND	ND
453	ND	ND	ND
544-3p	ND	ND	ND
544-5p	ND	ND	ND
654-3p	ND	ND	ND
654-5p	ND	ND	ND
679-3p	ND	ND	ND
ND = Not Detected
